# Supplementary material for: Population Genetic Structure and Chemotype Diversity of Fusarium graminearum Populations from Wheat in Canada and North Eastern United States
Source: Toxins (Basel). 2021 Mar 1;13(3):180. doi: 10.3390/toxins13030180 (PMC7999200; doi:10.3390/toxins13030180)
Supplement: Supplementary file 1 [file toxins-13-00180-s001.xlsx]

## Sheet: Sheet1
Table S1 - Sample information for 570 F. graminearum isolates used in this study and the VNTR data obtained
S/N	Isolate codea	Species	Year collected	Province	Geographic region	Crop district	Municipality/Town/County)	Host	Chemotype	HK1043b	HK913	HK917	HK957	HK965	HK967	HK1059	HK977	HK630	HK1073	CL1 c	CL2 c	Cluster d
1	UMPPL053	Fusarium graminearum	2018	Saskatchewan (SK)	Parkland region, Saskatchewan (SK1)	5B	Foam Lake	Spring wheat	3ADON	266	240	266	300	240	248	266	210	260	166	0.971	0.029	CL1
2	UMPPL054	Fusarium graminearum	2018	Saskatchewan (SK)	Parkland region, Saskatchewan (SK1)	5B	Foam Lake	Spring wheat	3ADON	249	233	255	300	255	220	255	230	255	170	0.971	0.029	CL1
3	UMPPL055	Fusarium graminearum	2018	Saskatchewan (SK)	Parkland region, Saskatchewan (SK1)	5B	Foam Lake	Spring wheat	3ADON	240	233	255	200	255	220	255	230	230	200	0.868	0.132	CL1
4	UMPPL056	Fusarium graminearum	2018	Saskatchewan (SK)	Parkland region, Saskatchewan (SK1)	5B	Foam Lake	Spring wheat	15ADON	255	233	266	300	240	248	266	210	255	166	0.974	0.026	CL1
5	UMPPL057	Fusarium graminearum	2018	Saskatchewan (SK)	Parkland region, Saskatchewan (SK1)	5B	Foam Lake	Spring wheat	15ADON	260	233	266	300	233	248	266	210	260	166	0.981	0.019	CL1
6	UMPPL058	Fusarium graminearum	2018	Saskatchewan (SK)	Parkland region, Saskatchewan (SK1)	5B	Foam Lake	Spring wheat	15ADON	240	230	248	255	280	248	266	233	260	190	0.791	0.209	CL1
7	UMPPL059	Fusarium graminearum	2018	Saskatchewan (SK)	Parkland region, Saskatchewan (SK1)	6B	Saskatoon	Spring wheat	3ADON	248	240	248	210	255	210	248	230	255	200	0.976	0.024	CL1
8	UMPPL060	Fusarium graminearum	2018	Saskatchewan (SK)	Parkland region, Saskatchewan (SK1)	6B	Saskatoon	Spring wheat	3ADON	240	233	233	290	255	200	248	230	233	200	0.969	0.031	CL1
9	UMPPL061	Fusarium graminearum	2018	Saskatchewan (SK)	Parkland region, Saskatchewan (SK1)	6B	Saskatoon	Spring wheat	3ADON	240	233	240	200	233	220	240	220	233	220	0.933	0.067	CL1
10	UMPPL062	Fusarium graminearum	2018	Saskatchewan (SK)	Parkland region, Saskatchewan (SK1)	6B	Saskatoon	Spring wheat	3ADON	270	233	248	300	266	230	248	233	255	180	0.971	0.029	CL1
11	UMPPL063	Fusarium graminearum	2018	Saskatchewan (SK)	Parkland region, Saskatchewan (SK1)	6B	Saskatoon	Spring wheat	15ADON	220	210	248	210	260	190	248	220	240	200	0.418	0.582	CL2
12	UMPPL064	Fusarium graminearum	2018	Saskatchewan (SK)	Parkland region, Saskatchewan (SK1)	8A	Barrier Valley	Spring wheat	3ADON	240	220	255	200	266	220	230	230	266	210	0.65	0.35	CL1
13	UMPPL065	Fusarium graminearum	2018	Saskatchewan (SK)	Parkland region, Saskatchewan (SK1)	8A	Tisdale	Spring wheat	3ADON	233	190	240	233	255	230	255	230	230	120	0.411	0.589	CL2
14	UMPPL066	Fusarium graminearum	2018	Saskatchewan (SK)	Parkland region, Saskatchewan (SK1)	8A	Melfort	Spring wheat	3ADON	248	233	266	300	266	240	266	230	260	170	0.962	0.038	CL1
15	UMPPL067	Fusarium graminearum	2018	Saskatchewan (SK)	Parkland region, Saskatchewan (SK1)	8A	Melfort	Spring wheat	3ADON	255	233	248	200	266	240	266	230	260	190	0.975	0.025	CL1
16	UMPPL068	Fusarium graminearum	2018	Saskatchewan (SK)	Parkland region, Saskatchewan (SK1)	8A	Melfort	Spring wheat	3ADON	260	233	255	230	266	240	266	220	260	190	0.98	0.02	CL1
17	UMPPL069	Fusarium graminearum	2018	Saskatchewan (SK)	Parkland region, Saskatchewan (SK1)	8A	Melfort	Spring wheat	3ADON	248	233	230	210	248	220	248	230	260	200	0.987	0.013	CL1
18	UMPPL070	Fusarium graminearum	2018	Saskatchewan (SK)	Parkland region, Saskatchewan (SK1)	8A	Melfort	Spring wheat	3ADON	260	233	240	333	233	220	220	230	260	200	0.975	0.025	CL1
19	UMPPL071	Fusarium graminearum	2018	Saskatchewan (SK)	Parkland region, Saskatchewan (SK1)	8A	Melfort	Spring wheat	3ADON	240	233	240	333	255	220	248	233	260	170	0.975	0.025	CL1
20	UMPPL072	Fusarium graminearum	2018	Saskatchewan (SK)	Parkland region, Saskatchewan (SK1)	8A	Melfort	Spring wheat	3ADON	248	233	233	233	255	230	255	233	260	190	0.985	0.015	CL1
21	UMPPL073	Fusarium graminearum	2018	Saskatchewan (SK)	Parkland region, Saskatchewan (SK1)	8A	Melfort	Spring wheat	3ADON	233	233	240	220	266	230	266	248	260	190	0.974	0.026	CL1
22	UMPPL074	Fusarium graminearum	2018	Saskatchewan (SK)	Parkland region, Saskatchewan (SK1)	8A	Melfort	Spring wheat	3ADON	248	233	233	220	266	230	266	248	260	190	0.986	0.014	CL1
23	UMPPL075	Fusarium graminearum	2018	Saskatchewan (SK)	Parkland region, Saskatchewan (SK1)	8A	Melfort	Spring wheat	3ADON	266	230	233	220	255	230	266	248	233	190	0.981	0.019	CL1
24	UMPPL076	Fusarium graminearum	2018	Saskatchewan (SK)	Parkland region, Saskatchewan (SK1)	8A	Melfort	Spring wheat	3ADON	240	230	255	330	240	230	260	220	260	166	0.988	0.012	CL1
25	UMPPL077	Fusarium graminearum	2018	Saskatchewan (SK)	Parkland region, Saskatchewan (SK1)	8A	Melfort	Spring wheat	3ADON	233	230	248	230	266	230	260	240	233	190	0.967	0.033	CL1
26	UMPPL078	Fusarium graminearum	2018	Saskatchewan (SK)	Parkland region, Saskatchewan (SK1)	8A	Melfort	Spring wheat	3ADON	240	233	255	220	240	230	260	248	260	190	0.988	0.012	CL1
27	UMPPL079	Fusarium graminearum	2018	Saskatchewan (SK)	Parkland region, Saskatchewan (SK1)	8A	Melfort	Spring wheat	3ADON	255	233	255	320	255	230	260	248	260	190	0.99	0.01	CL1
28	UMPPL080	Fusarium graminearum	2018	Saskatchewan (SK)	Parkland region, Saskatchewan (SK1)	8A	Melfort	Spring wheat	3ADON	240	233	255	320	240	230	260	248	260	166	0.988	0.012	CL1
29	UMPPL081	Fusarium graminearum	2018	Saskatchewan (SK)	Parkland region, Saskatchewan (SK1)	8A	Melfort	Spring wheat	3ADON	266	233	248	220	255	230	260	248	260	166	0.986	0.014	CL1
30	UMPPL082	Fusarium graminearum	2018	Saskatchewan (SK)	Parkland region, Saskatchewan (SK1)	8A	Melfort	Spring wheat	3ADON	248	233	230	330	240	230	260	248	260	190	0.991	0.009	CL1
31	UMPPL083	Fusarium graminearum	2018	Saskatchewan (SK)	Parkland region, Saskatchewan (SK1)	8A	Melfort	Spring wheat	3ADON	240	233	230	220	255	230	260	230	260	190	0.986	0.014	CL1
32	UMPPL084	Fusarium graminearum	2018	Saskatchewan (SK)	Parkland region, Saskatchewan (SK1)	8A	Melfort	Spring wheat	3ADON	240	233	240	200	233	220	260	248	233	190	0.985	0.015	CL1
33	UMPPL085	Fusarium graminearum	2018	Saskatchewan (SK)	Parkland region, Saskatchewan (SK1)	8A	Melfort	Spring wheat	3ADON	240	220	240	220	255	233	260	255	240	166	0.98	0.02	CL1
34	UMPPL086	Fusarium graminearum	2018	Saskatchewan (SK)	Parkland region, Saskatchewan (SK1)	8A	Melfort	Spring wheat	3ADON	240	220	230	300	233	230	260	248	240	166	0.989	0.011	CL1
35	UMPPL087	Fusarium graminearum	2018	Saskatchewan (SK)	Parkland region, Saskatchewan (SK1)	8A	Melfort	Spring wheat	3ADON	266	230	230	330	233	230	260	230	240	210	0.985	0.015	CL1
36	UMPPL088	Fusarium graminearum	2018	Saskatchewan (SK)	Parkland region, Saskatchewan (SK1)	8A	Melfort	Spring wheat	3ADON	260	233	230	220	255	230	260	255	260	220	0.979	0.021	CL1
37	UMPPL089	Fusarium graminearum	2018	Saskatchewan (SK)	Parkland region, Saskatchewan (SK1)	8A	Melfort	Spring wheat	3ADON	266	230	230	300	233	230	260	248	260	170	0.988	0.012	CL1
38	UMPPL090	Fusarium graminearum	2018	Saskatchewan (SK)	Parkland region, Saskatchewan (SK1)	8A	Melfort	Spring wheat	3ADON	270	233	230	330	233	233	255	255	266	230	0.975	0.025	CL1
39	UMPPL091	Fusarium graminearum	2018	Saskatchewan (SK)	Parkland region, Saskatchewan (SK1)	8A	Melfort	Spring wheat	3ADON	255	230	230	330	233	233	255	255	266	230	0.968	0.032	CL1
40	UMPPL092	Fusarium graminearum	2018	Saskatchewan (SK)	Parkland region, Saskatchewan (SK1)	8A	Melfort	Spring wheat	3ADON	233	230	233	210	233	220	240	220	233	233	0.949	0.051	CL1
41	UMPPL093	Fusarium graminearum	2018	Saskatchewan (SK)	Parkland region, Saskatchewan (SK1)	8A	Melfort	Spring wheat	3ADON	266	230	240	220	240	230	240	230	270	233	0.539	0.461	CL1
42	UMPPL094	Fusarium graminearum	2018	Saskatchewan (SK)	Parkland region, Saskatchewan (SK1)	8A	Melfort	Spring wheat	3ADON	270	233	230	333	240	233	248	230	270	233	0.972	0.028	CL1
43	UMPPL095	Fusarium graminearum	2018	Saskatchewan (SK)	Parkland region, Saskatchewan (SK1)	8A	Melfort	Spring wheat	3ADON	270	233	240	333	255	233	248	230	270	233	0.962	0.038	CL1
44	UMPPL096	Fusarium graminearum	2018	Saskatchewan (SK)	Parkland region, Saskatchewan (SK1)	8A	Melfort	Spring wheat	3ADON	266	233	233	340	248	233	248	233	270	233	0.85	0.15	CL1
45	UMPPL097	Fusarium graminearum	2018	Saskatchewan (SK)	Parkland region, Saskatchewan (SK1)	8A	Melfort	Spring wheat	3ADON	266	230	248	225	240	233	248	233	266	233	0.903	0.097	CL1
46	UMPPL098	Fusarium graminearum	2018	Saskatchewan (SK)	Parkland region, Saskatchewan (SK1)	8A	Melfort	Spring wheat	3ADON	266	230	248	230	240	248	255	233	266	233	0.855	0.145	CL1
47	UMPPL099	Fusarium graminearum	2018	Saskatchewan (SK)	Parkland region, Saskatchewan (SK1)	8A	Melfort	Spring wheat	3ADON	240	233	248	333	255	240	255	233	270	233	0.94	0.06	CL1
48	UMPPL100	Fusarium graminearum	2018	Saskatchewan (SK)	Parkland region, Saskatchewan (SK1)	8A	Melfort	Spring wheat	3ADON	233	233	248	230	233	240	260	233	266	233	0.911	0.089	CL1
49	UMPPL101	Fusarium graminearum	2018	Saskatchewan (SK)	Parkland region, Saskatchewan (SK1)	8A	Melfort	Spring wheat	3ADON	248	230	248	333	255	248	255	233	270	230	0.957	0.043	CL1
50	UMPPL102	Fusarium graminearum	2018	Saskatchewan (SK)	Parkland region, Saskatchewan (SK1)	8A	Melfort	Spring wheat	3ADON	270	233	233	240	248	248	230	230	270	220	0.792	0.208	CL1
51	UMPPL103	Fusarium graminearum	2018	Saskatchewan (SK)	Parkland region, Saskatchewan (SK1)	8A	Melfort	Spring wheat	3ADON	360	233	248	230	233	240	255	230	266	200	0.923	0.077	CL1
52	UMPPL104	Fusarium graminearum	2018	Saskatchewan (SK)	Parkland region, Saskatchewan (SK1)	8A	Melfort	Spring wheat	3ADON	266	233	233	355	233	240	255	230	270	200	0.952	0.048	CL1
53	UMPPL105	Fusarium graminearum	2018	Saskatchewan (SK)	Parkland region, Saskatchewan (SK1)	8A	Melfort	Spring wheat	3ADON	270	233	248	333	248	240	255	230	270	190	0.983	0.017	CL1
54	UMPPL106	Fusarium graminearum	2018	Saskatchewan (SK)	Parkland region, Saskatchewan (SK1)	8A	Melfort	Spring wheat	15ADON	266	230	240	233	255	230	260	233	260	190	0.978	0.022	CL1
55	UMPPL107	Fusarium graminearum	2018	Saskatchewan (SK)	Parkland region, Saskatchewan (SK1)	8B	Birch Hills	Spring wheat	3ADON	240	210	255	200	266	220	230	230	233	133	0.414	0.586	CL2
56	UMPPL108	Fusarium graminearum	2018	Saskatchewan (SK)	Parkland region, Saskatchewan (SK1)	8B	Birch Hills	Spring wheat	3ADON	270	240	266	255	270	240	266	233	200	200	0.198	0.802	CL2
57	UMPPL109	Fusarium graminearum	2018	Saskatchewan (SK)	Parkland region, Saskatchewan (SK1)	8B	Birch Hills	Spring wheat	3ADON	270	240	266	233	270	240	266	230	200	200	0.317	0.683	CL2
58	UMPPL110	Fusarium graminearum	2018	Saskatchewan (SK)	Parkland region, Saskatchewan (SK1)	9A	Prince Albert	Spring wheat	15ADON	248	233	266	255	280	240	266	233	200	200	0.225	0.775	CL2
59	UMPPL111	Fusarium graminearum	2018	Saskatchewan (SK)	Southern Saskatchewan (SK2)	1A	Antler	Spring wheat	3ADON	270	220	230	230	240	210	200	220	248	190	0.973	0.027	CL1
60	UMPPL112	Fusarium graminearum	2018	Saskatchewan (SK)	Southern Saskatchewan (SK2)	1A	Antler	Spring wheat	3ADON	230	210	240	180	255	230	255	233	266	200	0.352	0.648	CL2
61	UMPPL113	Fusarium graminearum	2018	Saskatchewan (SK)	Southern Saskatchewan (SK2)	1A	Antler	Spring wheat	15ADON	330	233	248	160	240	200	233	230	280	240	0.028	0.972	CL2
62	UMPPL114	Fusarium graminearum	2018	Saskatchewan (SK)	Southern Saskatchewan (SK2)	1A	Antler	Spring wheat	15ADON	270	248	240	190	240	200	220	220	255	240	0.036	0.964	CL2
63	UMPPL115	Fusarium graminearum	2018	Saskatchewan (SK)	Southern Saskatchewan (SK2)	1A	Antler	Spring wheat	15ADON	290	240	240	160	240	190	233	230	280	240	0.02	0.98	CL2
64	UMPPL116	Fusarium graminearum	2018	Saskatchewan (SK)	Southern Saskatchewan (SK2)	1A	Antler	Spring wheat	15ADON	248	?	240	330	230	220	240	220	245	200	0.97	0.023	CL1
65	UMPPL117	Fusarium graminearum	2018	Saskatchewan (SK)	Southern Saskatchewan (SK2)	1A	Antler	Spring wheat	15ADON	280	233	240	180	230	220	248	230	280	240	0.137	0.863	CL2
66	UMPPL118	Fusarium graminearum	2018	Saskatchewan (SK)	Southern Saskatchewan (SK2)	1A	Antler	Spring wheat	15ADON	290	248	240	180	248	220	240	233	266	240	0.037	0.963	CL2
67	UMPPL119	Fusarium graminearum	2018	Saskatchewan (SK)	Southern Saskatchewan (SK2)	1B	Maryfield	Spring wheat	3ADON	290	220	240	230	260	230	255	233	240	190	0.891	0.109	CL1
68	UMPPL120	Fusarium graminearum	2018	Saskatchewan (SK)	Southern Saskatchewan (SK2)	1B	Maryfield	Spring wheat	3ADON	248	240	240	230	266	230	266	233	245	190	0.956	0.044	CL1
69	UMPPL121	Fusarium graminearum	2018	Saskatchewan (SK)	Southern Saskatchewan (SK2)	1B	Maryfield	Spring wheat	3ADON	230	220	240	333	233	230	266	240	248	190	0.98	0.02	CL1
70	UMPPL122	Fusarium graminearum	2018	Saskatchewan (SK)	Southern Saskatchewan (SK2)	1B	Maryfield	Spring wheat	3ADON	248	230	233	230	266	230	266	240	248	200	0.969	0.031	CL1
71	UMPPL123	Fusarium graminearum	2018	Saskatchewan (SK)	Southern Saskatchewan (SK2)	1B	Maryfield	Spring wheat	3ADON	248	233	233	333	240	230	266	233	266	200	0.976	0.024	CL1
72	UMPPL124	Fusarium graminearum	2018	Saskatchewan (SK)	Southern Saskatchewan (SK2)	1B	Maryfield	Spring wheat	3ADON	248	230	233	333	248	230	266	233	266	200	0.971	0.029	CL1
73	UMPPL125	Fusarium graminearum	2018	Saskatchewan (SK)	Southern Saskatchewan (SK2)	1B	Maryfield	Spring wheat	3ADON	248	230	233	333	248	230	266	240	270	210	0.969	0.031	CL1
74	UMPPL126	Fusarium graminearum	2018	Saskatchewan (SK)	Southern Saskatchewan (SK2)	1B	Moosemin	Spring wheat	15ADON	260	240	230	266	248	220	266	266	290	210	0.467	0.533	CL2
75	UMPPL127	Fusarium graminearum	2018	Saskatchewan (SK)	Southern Saskatchewan (SK2)	1B	Moosemin	Spring wheat	15ADON	320	230	233	180	280	230	240	240	280	240	0.039	0.961	CL2
76	UMPPL128	Fusarium graminearum	2018	Saskatchewan (SK)	Southern Saskatchewan (SK2)	1B	Moosemin	Spring wheat	15ADON	248	230	230	260	248	230	255	255	280	210	0.912	0.088	CL1
77	UMPPL129	Fusarium graminearum	2018	Saskatchewan (SK)	Southern Saskatchewan (SK2)	1B	Moosemin	Spring wheat	15ADON	248	233	230	333	240	220	255	233	258	175	0.983	0.017	CL1
78	UMPPL130	Fusarium graminearum	2018	Saskatchewan (SK)	Southern Saskatchewan (SK2)	2B	Indian Head	Spring wheat	3ADON	248	230	260	255	266	240	266	233	266	240	0.071	0.929	CL2
79	UMPPL131	Fusarium graminearum	2018	Saskatchewan (SK)	Southern Saskatchewan (SK2)	2B	Indian Head	Spring wheat	3ADON	248	230	266	255	266	240	266	233	233	245	0.194	0.806	CL2
80	UMPPL132	Fusarium graminearum	2018	Saskatchewan (SK)	Southern Saskatchewan (SK2)	2B	Indian Head	Spring wheat	3ADON	280	?	230	240	233	240	220	220	255	190	0.96	0.038	CL1
81	UMPPL133	Fusarium graminearum	2018	Saskatchewan (SK)	Southern Saskatchewan (SK2)	2B	Indian Head	Spring wheat	3ADON	233	230	230	310	230	233	255	230	233	190	0.986	0.014	CL1
82	UMPPL134	Fusarium graminearum	2018	Saskatchewan (SK)	Southern Saskatchewan (SK2)	2B	Indian Head	Spring wheat	3ADON	248	233	230	310	220	233	255	230	233	190	0.988	0.012	CL1
83	UMPPL135	Fusarium graminearum	2018	Saskatchewan (SK)	Southern Saskatchewan (SK2)	2B	Indian Head	Spring wheat	3ADON	260	233	230	230	233	240	220	220	260	190	0.983	0.017	CL1
84	UMPPL136	Fusarium graminearum	2018	Saskatchewan (SK)	Southern Saskatchewan (SK2)	2B	Indian Head	Spring wheat	3ADON	240	230	230	230	233	240	220	220	260	190	0.98	0.02	CL1
85	UMPPL137	Fusarium graminearum	2018	Saskatchewan (SK)	Southern Saskatchewan (SK2)	2B	Indian Head	Spring wheat	3ADON	233	220	230	230	230	240	220	220	260	190	0.976	0.024	CL1
86	UMPPL138	Fusarium graminearum	2018	Saskatchewan (SK)	Southern Saskatchewan (SK2)	2B	Indian Head	Spring wheat	3ADON	233	220	230	220	220	233	210	210	260	190	0.96	0.04	CL1
87	UMPPL139	Fusarium graminearum	2018	Saskatchewan (SK)	Southern Saskatchewan (SK2)	2B	Indian Head	Spring wheat	3ADON	266	233	233	230	233	220	210	220	260	190	0.972	0.028	CL1
88	UMPPL140	Fusarium graminearum	2018	Saskatchewan (SK)	Southern Saskatchewan (SK2)	2B	Indian Head	Spring wheat	3ADON	240	233	233	300	233	215	240	230	240	190	0.981	0.019	CL1
89	UMPPL141	Fusarium graminearum	2018	Saskatchewan (SK)	Southern Saskatchewan (SK2)	2B	Indian Head	Spring wheat	3ADON	240	240	240	233	240	230	220	230	260	190	0.949	0.051	CL1
90	UMPPL142	Fusarium graminearum	2018	Saskatchewan (SK)	Southern Saskatchewan (SK2)	2B	Indian Head	Spring wheat	3ADON	270	233	255	300	248	220	240	220	240	190	0.986	0.014	CL1
91	UMPPL143	Fusarium graminearum	2018	Saskatchewan (SK)	Southern Saskatchewan (SK2)	2B	Indian Head	Spring wheat	3ADON	266	233	240	233	248	230	220	230	260	190	0.966	0.034	CL1
92	UMPPL144	Fusarium graminearum	2018	Saskatchewan (SK)	Southern Saskatchewan (SK2)	2B	Indian Head	Spring wheat	3ADON	233	230	240	233	240	230	220	230	260	190	0.953	0.047	CL1
93	UMPPL145	Fusarium graminearum	2018	Saskatchewan (SK)	Southern Saskatchewan (SK2)	2B	Indian Head	Spring wheat	3ADON	233	233	233	290	233	210	248	230	240	190	0.987	0.013	CL1
94	UMPPL146	Fusarium graminearum	2018	Saskatchewan (SK)	Southern Saskatchewan (SK2)	2B	Indian Head	Spring wheat	3ADON	270	233	255	290	240	230	248	230	260	190	0.989	0.011	CL1
95	UMPPL147	Fusarium graminearum	2018	Saskatchewan (SK)	Southern Saskatchewan (SK2)	2B	Indian Head	Spring wheat	3ADON	240	220	240	220	255	230	220	220	260	190	0.973	0.027	CL1
96	UMPPL148	Fusarium graminearum	2018	Saskatchewan (SK)	Southern Saskatchewan (SK2)	2B	Indian Head	Spring wheat	3ADON	233	230	233	280	240	220	248	230	240	190	0.983	0.017	CL1
97	UMPPL149	Fusarium graminearum	2018	Saskatchewan (SK)	Southern Saskatchewan (SK2)	2B	Indian Head	Spring wheat	3ADON	248	233	233	270	240	230	248	220	260	190	0.984	0.016	CL1
98	UMPPL150	Fusarium graminearum	2018	Saskatchewan (SK)	Southern Saskatchewan (SK2)	2B	Indian Head	Spring wheat	3ADON	230	230	233	266	240	230	248	220	260	190	0.974	0.026	CL1
99	UMPPL151	Fusarium graminearum	2018	Saskatchewan (SK)	Southern Saskatchewan (SK2)	2B	Indian Head	Spring wheat	3ADON	240	240	233	270	240	220	248	220	260	190	0.975	0.025	CL1
100	UMPPL152	Fusarium graminearum	2018	Saskatchewan (SK)	Southern Saskatchewan (SK2)	2B	Indian Head	Spring wheat	3ADON	248	233	233	270	240	230	248	220	260	190	0.984	0.016	CL1
101	UMPPL153	Fusarium graminearum	2018	Saskatchewan (SK)	Southern Saskatchewan (SK2)	2B	Indian Head	Spring wheat	3ADON	240	240	233	270	233	210	248	220	260	190	0.978	0.022	CL1
102	UMPPL154	Fusarium graminearum	2018	Saskatchewan (SK)	Southern Saskatchewan (SK2)	2B	Indian Head	Spring wheat	3ADON	240	240	248	200	270	210	248	220	260	166	0.978	0.022	CL1
103	UMPPL155	Fusarium graminearum	2018	Saskatchewan (SK)	Southern Saskatchewan (SK2)	2B	Indian Head	Spring wheat	3ADON	248	233	233	280	255	210	255	220	260	200	0.989	0.011	CL1
104	UMPPL156	Fusarium graminearum	2018	Saskatchewan (SK)	Southern Saskatchewan (SK2)	2B	Indian Head	Spring wheat	3ADON	248	233	233	280	255	210	255	220	260	200	0.989	0.011	CL1
105	UMPPL157	Fusarium graminearum	2018	Saskatchewan (SK)	Southern Saskatchewan (SK2)	2B	Indian Head	Spring wheat	3ADON	255	240	248	200	270	210	248	230	260	170	0.938	0.062	CL1
106	UMPPL158	Fusarium graminearum	2018	Saskatchewan (SK)	Southern Saskatchewan (SK2)	2B	Indian Head	Spring wheat	3ADON	280	233	233	280	255	210	248	210	260	200	0.985	0.015	CL1
107	UMPPL159	Fusarium graminearum	2018	Saskatchewan (SK)	Southern Saskatchewan (SK2)	2B	Indian Head	Spring wheat	3ADON	248	230	240	233	200	233	220	233	266	210	0.561	0.439	CL1
108	UMPPL160	Fusarium graminearum	2018	Saskatchewan (SK)	Southern Saskatchewan (SK2)	2B	Indian Head	Spring wheat	3ADON	240	230	266	230	266	233	266	233	266	160	0.423	0.577	CL2
109	UMPPL161	Fusarium graminearum	2018	Saskatchewan (SK)	Southern Saskatchewan (SK2)	2B	Indian Head	Spring wheat	3ADON	248	233	266	310	240	230	240	240	266	160	0.847	0.153	CL1
110	UMPPL162	Fusarium graminearum	2018	Saskatchewan (SK)	Southern Saskatchewan (SK2)	2B	Indian Head	Spring wheat	3ADON	245	233	240	300	240	230	260	240	266	210	0.945	0.055	CL1
111	UMPPL163	Fusarium graminearum	2018	Saskatchewan (SK)	Southern Saskatchewan (SK2)	2B	Indian Head	Spring wheat	3ADON	240	233	240	300	240	233	240	240	266	210	0.967	0.033	CL1
112	UMPPL164	Fusarium graminearum	2018	Saskatchewan (SK)	Southern Saskatchewan (SK2)	2B	Indian Head	Spring wheat	3ADON	248	233	248	300	240	233	240	240	270	210	0.977	0.023	CL1
113	UMPPL165	Fusarium graminearum	2018	Saskatchewan (SK)	Southern Saskatchewan (SK2)	2B	Indian Head	Durum wheat	3ADON	248	233	266	310	240	233	240	245	270	210	0.812	0.188	CL1
114	UMPPL166	Fusarium graminearum	2018	Saskatchewan (SK)	Southern Saskatchewan (SK2)	2B	Indian Head	Durum wheat	3ADON	245	233	266	220	260	233	240	245	270	160	0.283	0.717	CL2
115	UMPPL167	Fusarium graminearum	2018	Saskatchewan (SK)	Southern Saskatchewan (SK2)	2B	Indian Head	Spring wheat	15ADON	260	233	248	200	255	220	220	230	260	233	0.867	0.133	CL1
116	UMPPL168	Fusarium graminearum	2018	Saskatchewan (SK)	Southern Saskatchewan (SK2)	6A	Dufferin	Spring wheat	15ADON	266	230	240	233	240	220	255	220	220	210	0.631	0.369	CL1
117	UMPPL169	Fusarium graminearum	2018	Saskatchewan (SK)	Southern Saskatchewan (SK2)	6A	Craik	Spring wheat	3ADON	266	240	233	210	240	220	233	220	266	200	0.845	0.155	CL1
118	UMPPL170	Fusarium graminearum	2018	Saskatchewan (SK)	Southern Saskatchewan (SK2)	6A	Craik	Spring wheat	3ADON	233	230	240	166	255	230	255	230	255	230	0.365	0.635	CL2
119	UMPPL171	Fusarium graminearum	2018	Saskatchewan (SK)	Southern Saskatchewan (SK2)	6A	Craik	Spring wheat	15ADON	240	233	248	190	255	210	248	230	233	200	0.839	0.161	CL1
120	UMPPL172	Fusarium graminearum	2018	Saskatchewan (SK)	Southern Saskatchewan (SK2)	6A	Craik	Spring wheat	15ADON	240	240	240	166	255	210	233	230	280	240	0.049	0.951	CL2
121	UMPPL173	Fusarium graminearum	2018	Saskatchewan (SK)	Southern Saskatchewan (SK2)	6A	Craik	Spring wheat	15ADON	280	255	260	180	248	210	266	233	260	233	0.03	0.97	CL2
122	UMPPL174	Fusarium graminearum	2018	Saskatchewan (SK)	Southern Saskatchewan (SK2)	6A	Craik	Spring wheat	15ADON	260	240	233	210	240	220	200	220	266	200	0.846	0.154	CL1
123	UMPPL175	Fusarium graminearum	2018	Saskatchewan (SK)	Southern Saskatchewan (SK2)	6A	Craik	Spring wheat	15ADON	233	240	248	190	255	210	248	220	233	200	0.739	0.261	CL1
124	UMPPL176	Fusarium graminearum	2018	Saskatchewan (SK)	Southern Saskatchewan (SK2)	6A	Craik	Spring wheat	15ADON	248	230	255	220	248	248	266	233	260	190	0.985	0.015	CL1
125	UMPPL177	Fusarium graminearum	2018	Saskatchewan (SK)	Southern Saskatchewan (SK2)	6A	Craik	Spring wheat	15ADON	270	240	266	200	255	240	266	233	233	190	0.921	0.079	CL1
126	UMPPL178	Fusarium graminearum	2018	Saskatchewan (SK)	Southern Saskatchewan (SK2)	7A	Snipe Lake	Spring wheat	3ADON	255	230	248	233	266	248	233	233	260	200	0.909	0.091	CL1
127	UMPPL179	Fusarium graminearum	2018	Manitoba (MB)	Southwest Manitoba (MB1)	1	Killarney-Turtle Mountain	Spring wheat	3ADON	248	230	233	320	233	240	240	233	240	190	0.985	0.015	CL1
128	UMPPL180	Fusarium graminearum	2018	Manitoba (MB)	Southwest Manitoba (MB1)	1	Killarney-Turtle Mountain	Spring wheat	15ADON	255	240	248	220	310	240	266	240	260	258	0.178	0.822	CL2
129	UMPPL181	Fusarium graminearum	2018	Manitoba (MB)	Southwest Manitoba (MB1)	1	Killarney-Turtle Mountain	Spring wheat	3ADON	260	240	233	280	266	248	255	240	270	190	0.981	0.019	CL1
130	UMPPL182	Fusarium graminearum	2018	Manitoba (MB)	Southwest Manitoba (MB1)	1	Killarney-Turtle Mountain	Spring wheat	3ADON	270	233	233	280	270	248	255	240	270	190	0.986	0.014	CL1
131	UMPPL183	Fusarium graminearum	2018	Manitoba (MB)	Southwest Manitoba (MB1)	1	Morton	Spring wheat	3ADON	240	240	255	320	233	240	266	210	270	166	0.964	0.036	CL1
132	UMPPL184	Fusarium graminearum	2018	Manitoba (MB)	Southwest Manitoba (MB1)	1	Morton	Spring wheat	15ADON	240	230	248	170	248	240	266	220	270	240	0.106	0.894	CL2
133	UMPPL185	Fusarium graminearum	2018	Manitoba (MB)	Southwest Manitoba (MB1)	1	Morton	Spring wheat	3ADON	280	233	255	233	233	240	266	200	275	220	0.814	0.186	CL1
134	UMPPL186	Fusarium graminearum	2018	Manitoba (MB)	Southwest Manitoba (MB1)	1	Brenda	Spring wheat	15ADON	260	240	255	215	240	233	260	200	255	240	0.989	0.011	CL1
135	UMPPL187	Fusarium graminearum	2018	Manitoba (MB)	Southwest Manitoba (MB1)	1	Brenda	Spring wheat	15ADON	260	240	248	?	240	233	260	200	248	240	0.925	0.075	CL1
136	UMPPL188	Fusarium graminearum	2018	Manitoba (MB)	Southwest Manitoba (MB1)	1	Brenda	Spring wheat	15ADON	255	248	255	215	240	230	260	200	266	200	0.858	0.142	CL1
137	UMPPL189	Fusarium graminearum	2018	Manitoba (MB)	Southwest Manitoba (MB1)	1	Brenda	Spring wheat	3ADON	260	233	248	320	233	233	260	200	280	170	0.962	0.038	CL1
138	UMPPL190	Fusarium graminearum	2018	Manitoba (MB)	Southwest Manitoba (MB1)	1	Brenda	Spring wheat	15ADON	300	260	248	233	233	233	266	200	280	233	0.92	0.08	CL1
139	UMPPL191	Fusarium graminearum	2018	Manitoba (MB)	Southwest Manitoba (MB1)	1	Brenda	Spring wheat	3ADON	233	233	248	300	248	190	233	210	280	170	0.87	0.122	CL1
140	UMPPL192	Fusarium graminearum	2018	Manitoba (MB)	Southwest Manitoba (MB1)	1	Brenda	Spring wheat	15ADON	248	230	255	220	248	230	233	230	266	200	0.954	0.046	CL1
141	UMPPL193	Fusarium graminearum	2018	Manitoba (MB)	Southwest Manitoba (MB1)	1	Edward	Spring wheat	15ADON	230	220	233	210	255	230	210	240	245	175	0.953	0.047	CL1
142	UMPPL194	Fusarium graminearum	2018	Manitoba (MB)	Southwest Manitoba (MB1)	1	Edward	Spring wheat	3ADON	248	230	255	300	248	230	248	220	245	175	0.118	0.882	CL2
143	UMPPL195	Fusarium graminearum	2018	Manitoba (MB)	Southwest Manitoba (MB1)	1	Edward	Spring wheat	3ADON	270	248	255	230	270	230	240	220	255	175	0.481	0.519	CL2
144	UMPPL196	Fusarium graminearum	2018	Manitoba (MB)	Southwest Manitoba (MB1)	1	Edward	Spring wheat	15ADON	280	266	248	166	255	220	230	230	255	255	0.917	0.083	CL1
145	UMPPL197	Fusarium graminearum	2018	Manitoba (MB)	Southwest Manitoba (MB1)	1	Edward	Spring wheat	3ADON	240	210	255	230	270	230	230	233	260	175	0.948	0.052	CL1
146	UMPPL198	Fusarium graminearum	2018	Manitoba (MB)	Southwest Manitoba (MB1)	1	Edward	Spring wheat	3ADON	255	240	255	230	270	230	240	233	260	175	0.028	0.972	CL2
147	UMPPL199	Fusarium graminearum	2018	Manitoba (MB)	Southwest Manitoba (MB1)	1	Edward	Spring wheat	15ADON	240	230	233	220	266	233	210	248	248	190	0.977	0.023	CL1
148	UMPPL200	Fusarium graminearum	2018	Manitoba (MB)	Southwest Manitoba (MB1)	2	Oakland	Spring wheat	3ADON	255	233	233	300	248	230	240	233	260	220	0.979	0.021	CL1
149	UMPPL201	Fusarium graminearum	2018	Manitoba (MB)	Southwest Manitoba (MB1)	2	Pipestone	Spring wheat	3ADON	248	233	248	225	266	220	255	233	248	220	0.973	0.027	CL1
150	UMPPL202	Fusarium graminearum	2018	Manitoba (MB)	Southwest Manitoba (MB1)	2	Pipestone	Spring wheat	15ADON	340	255	240	220	248	220	233	230	258	240	0.15	0.85	CL2
151	UMPPL203	Fusarium graminearum	2018	Manitoba (MB)	Southwest Manitoba (MB1)	2	Pipestone	Spring wheat	3ADON	280	255	240	230	266	230	240	230	266	220	0.954	0.046	CL1
152	UMPPL204	Fusarium graminearum	2018	Manitoba (MB)	Southwest Manitoba (MB1)	2	Pipestone	Spring wheat	3ADON	240	230	248	290	240	230	240	230	240	220	0.983	0.017	CL1
153	UMPPL205	Fusarium graminearum	2018	Manitoba (MB)	Southwest Manitoba (MB1)	2	Pipestone	Spring wheat	3ADON	270	233	248	290	240	220	240	230	260	180	0.954	0.046	CL1
154	UMPPL206	Fusarium graminearum	2018	Manitoba (MB)	Southwest Manitoba (MB1)	2	Pipestone	Spring wheat	3ADON	266	240	248	290	255	210	233	230	233	200	0.946	0.054	CL1
155	UMPPL207	Fusarium graminearum	2018	Manitoba (MB)	Southwest Manitoba (MB1)	2	Pipestone	Spring wheat	3ADON	260	240	248	210	266	220	233	230	233	190	0.983	0.017	CL1
156	UMPPL208	Fusarium graminearum	2018	Manitoba (MB)	Southwest Manitoba (MB1)	2	Pipestone	Spring wheat	3ADON	290	220	233	248	240	210	233	230	248	190	0.905	0.095	CL1
157	UMPPL209	Fusarium graminearum	2018	Manitoba (MB)	Southwest Manitoba (MB1)	2	Elton	Spring wheat	3ADON	260	233	233	210	255	210	233	220	270	170	0.762	0.238	CL1
158	UMPPL210	Fusarium graminearum	2018	Manitoba (MB)	Southwest Manitoba (MB1)	2	Elton	Spring wheat	3ADON	260	233	233	220	266	220	233	220	270	170	0.693	0.307	CL1
159	UMPPL211	Fusarium graminearum	2018	Manitoba (MB)	Southwest Manitoba (MB1)	2	Elton	Spring wheat	3ADON	266	233	233	230	266	220	233	220	270	170	0.922	0.078	CL1
160	UMPPL212	Fusarium graminearum	2018	Manitoba (MB)	Southwest Manitoba (MB1)	2	Elton	Spring wheat	3ADON	266	233	233	230	266	220	233	220	270	166	0.949	0.051	CL1
161	UMPPL213	Fusarium graminearum	2018	Manitoba (MB)	Southwest Manitoba (MB1)	2	Elton	Spring wheat	3ADON	260	233	233	230	266	210	233	220	266	166	0.971	0.029	CL1
162	UMPPL214	Fusarium graminearum	2018	Manitoba (MB)	Southwest Manitoba (MB1)	2	Elton	Spring wheat	3ADON	230	230	233	333	233	210	248	210	255	170	0.988	0.012	CL1
163	UMPPL215	Fusarium graminearum	2018	Manitoba (MB)	Southwest Manitoba (MB1)	2	Elton	Spring wheat	3ADON	248	230	233	333	233	210	248	210	255	175	0.932	0.068	CL1
164	UMPPL216	Fusarium graminearum	2018	Manitoba (MB)	Southwest Manitoba (MB1)	2	North Cypress - Langford	Spring wheat	3ADON	260	240	255	300	240	240	266	233	266	170	0.974	0.026	CL1
165	UMPPL217	Fusarium graminearum	2018	Manitoba (MB)	Southwest Manitoba (MB1)	2	North Cypress - Langford	Spring wheat	3ADON	266	240	233	290	233	240	266	230	266	210	0.303	0.697	CL2
166	UMPPL218	Fusarium graminearum	2018	Manitoba (MB)	Southwest Manitoba (MB1)	2	North Cypress - Langford	Spring wheat	3ADON	300	255	240	233	266	248	266	230	266	210	0.963	0.037	CL1
167	UMPPL219	Fusarium graminearum	2018	Manitoba (MB)	Southwest Manitoba (MB1)	2	North Cypress - Langford	Spring wheat	3ADON	248	210	233	233	266	248	266	230	266	210	0.96	0.04	CL1
168	UMPPL220	Fusarium graminearum	2018	Manitoba (MB)	Southwest Manitoba (MB1)	2	North Cypress - Langford	Spring wheat	3ADON	266	240	240	225	240	248	266	230	245	210	0.975	0.025	CL1
169	UMPPL221	Fusarium graminearum	2018	Manitoba (MB)	Southwest Manitoba (MB1)	2	North Cypress - Langford	Spring wheat	3ADON	248	240	230	300	240	248	266	230	270	220	0.962	0.038	CL1
170	UMPPL222	Fusarium graminearum	2018	Manitoba (MB)	Southwest Manitoba (MB1)	2	North Cypress - Langford	Spring wheat	3ADON	255	240	233	233	270	248	260	220	270	220	0.036	0.964	CL2
171	UMPPL223	Fusarium graminearum	2018	Manitoba (MB)	Southwest Manitoba (MB1)	3	Archie	Spring wheat	15ADON	310	230	230	200	248	210	240	233	270	240	0.634	0.366	CL1
172	UMPPL224	Fusarium graminearum	2018	Manitoba (MB)	Southwest Manitoba (MB1)	3	Archie	Spring wheat	3ADON	266	230	233	220	240	210	255	233	270	200	0.923	0.077	CL1
173	UMPPL225	Fusarium graminearum	2018	Manitoba (MB)	Southwest Manitoba (MB1)	3	Shoal Lake	Spring wheat	3ADON	280	255	233	220	266	220	240	210	260	200	0.961	0.039	CL1
174	UMPPL226	Fusarium graminearum	2018	Manitoba (MB)	Southwest Manitoba (MB1)	3	Shoal Lake	Spring wheat	3ADON	260	240	230	260	240	210	240	200	260	210	0.634	0.366	CL1
175	UMPPL227	Fusarium graminearum	2018	Manitoba (MB)	Southwest Manitoba (MB1)	3	Shoal Lake	Spring wheat	3ADON	230	220	233	300	233	220	233	210	260	220	0.372	0.628	CL2
176	UMPPL228	Fusarium graminearum	2018	Manitoba (MB)	Southwest Manitoba (MB1)	3	Shoal Lake	Spring wheat	3ADON	290	230	230	260	233	210	233	200	270	220	0.286	0.714	CL2
177	UMPPL229	Fusarium graminearum	2018	Manitoba (MB)	Southwest Manitoba (MB1)	3	Shoal Lake	Spring wheat	3ADON	233	210	240	220	266	220	233	200	266	220	0.897	0.103	CL1
178	UMPPL230	Fusarium graminearum	2018	Manitoba (MB)	Southwest Manitoba (MB1)	3	Shoal Lake	Spring wheat	15ADON	230	255	233	233	233	210	230	200	270	258	0.803	0.197	CL1
179	UMPPL231	Fusarium graminearum	2018	Manitoba (MB)	Southwest Manitoba (MB1)	3	Ellice	Spring wheat	3ADON	230	230	230	220	266	220	230	210	266	220	0.9	0.1	CL1
180	UMPPL232	Fusarium graminearum	2018	Manitoba (MB)	Southwest Manitoba (MB1)	3	Ellice	Spring wheat	3ADON	233	230	240	300	233	220	230	200	248	220	0.986	0.014	CL1
181	UMPPL233	Fusarium graminearum	2018	Manitoba (MB)	Southwest Manitoba (MB1)	3	Ellice	Spring wheat	3ADON	233	210	240	220	233	220	233	210	248	220	0.933	0.067	CL1
182	UMPPL234	Fusarium graminearum	2018	Manitoba (MB)	Southwest Manitoba (MB1)	3	Ellice	Spring wheat	15ADON	290	233	240	230	270	210	233	190	245	233	0.91	0.09	CL1
183	UMPPL235	Fusarium graminearum	2018	Manitoba (MB)	Southwest Manitoba (MB1)	3	Ellice	Spring wheat	15ADON	248	240	233	200	230	210	233	210	270	260	0.079	0.921	CL2
184	UMPPL236	Fusarium graminearum	2018	Manitoba (MB)	Southwest Manitoba (MB1)	3	Ellice	Spring wheat	3ADON	290	230	233	220	233	220	233	200	260	220	0.856	0.144	CL1
185	UMPPL237	Fusarium graminearum	2018	Manitoba (MB)	Southwest Manitoba (MB1)	3	Ellice	Spring wheat	15ADON	300	233	233	200	230	230	240	230	280	260	0.317	0.683	CL2
186	UMPPL238	Fusarium graminearum	2018	Manitoba (MB)	Southwest Manitoba (MB1)	3	Ellice	Spring wheat	3ADON	260	233	233	310	233	230	240	220	260	200	0.271	0.729	CL2
187	UMPPL239	Fusarium graminearum	2018	Manitoba (MB)	Southwest Manitoba (MB1)	3	Rosedale	Spring wheat	3ADON	270	248	240	210	240	248	260	230	255	220	0.456	0.544	CL2
188	UMPPL240	Fusarium graminearum	2018	Manitoba (MB)	Southwest Manitoba (MB1)	3	Rosedale	Spring wheat	15ADON	255	230	240	233	255	248	248	240	280	266	0.168	0.832	CL2
189	UMPPL241	Fusarium graminearum	2018	Manitoba (MB)	Central Manitoba (MB2)	7	Grey	Spring wheat	3ADON	270	230	240	300	230	233	248	270	233	190	0.988	0.012	CL1
190	UMPPL242	Fusarium graminearum	2018	Manitoba (MB)	Central Manitoba (MB2)	7	Grey	Spring wheat	3ADON	280	260	240	220	240	233	248	270	240	190	0.891	0.109	CL1
191	UMPPL243	Fusarium graminearum	2018	Manitoba (MB)	Central Manitoba (MB2)	7	Grey	Spring wheat	3ADON	248	233	230	220	240	233	248	270	255	190	0.989	0.011	CL1
192	UMPPL244	Fusarium graminearum	2018	Manitoba (MB)	Central Manitoba (MB2)	7	Grey	Spring wheat	3ADON	240	233	233	280	230	233	248	280	233	190	0.984	0.016	CL1
193	UMPPL245	Fusarium graminearum	2018	Manitoba (MB)	Central Manitoba (MB2)	7	Grey	Spring wheat	3ADON	270	233	230	220	230	233	240	270	260	190	0.987	0.013	CL1
194	UMPPL246	Fusarium graminearum	2018	Manitoba (MB)	Central Manitoba (MB2)	7	McDonald	Spring wheat	3ADON	260	230	233	220	240	233	240	290	240	190	0.983	0.017	CL1
195	UMPPL247	Fusarium graminearum	2018	Manitoba (MB)	Central Manitoba (MB2)	7	McDonald	Spring wheat	3ADON	240	240	233	220	240	233	240	290	233	190	0.984	0.016	CL1
196	UMPPL248	Fusarium graminearum	2018	Manitoba (MB)	Central Manitoba (MB2)	7	McDonald	Spring wheat	3ADON	240	210	233	220	240	233	240	290	233	190	0.984	0.016	CL1
197	UMPPL249	Fusarium graminearum	2018	Manitoba (MB)	Central Manitoba (MB2)	7	McDonald	Spring wheat	3ADON	233	210	233	180	233	220	220	266	?	166	0.67	0.326	CL1
198	UMPPL250	Fusarium graminearum	2018	Manitoba (MB)	Central Manitoba (MB2)	7	McDonald	Spring wheat	3ADON	255	240	233	220	233	230	248	290	233	190	0.986	0.014	CL1
199	UMPPL251	Fusarium graminearum	2018	Manitoba (MB)	Central Manitoba (MB2)	7	Cartier	Spring wheat	3ADON	260	220	233	280	240	233	248	300	233	180	0.988	0.012	CL1
200	UMPPL252	Fusarium graminearum	2018	Manitoba (MB)	Central Manitoba (MB2)	7	Cartier	Spring wheat	3ADON	233	210	233	280	240	233	248	300	233	180	0.984	0.016	CL1
201	UMPPL253	Fusarium graminearum	2018	Manitoba (MB)	Central Manitoba (MB2)	7	Cartier	Spring wheat	15ADON	300	230	233	180	210	230	255	300	248	230	0.953	0.047	CL1
202	UMPPL254	Fusarium graminearum	2018	Manitoba (MB)	Central Manitoba (MB2)	7	Cartier	Spring wheat	3ADON	280	255	233	290	220	230	248	300	260	190	0.964	0.036	CL1
203	UMPPL255	Fusarium graminearum	2018	Manitoba (MB)	Central Manitoba (MB2)	7	Cartier	Spring wheat	3ADON	255	248	220	300	230	220	248	270	260	180	0.94	0.06	CL1
204	UMPPL256	Fusarium graminearum	2018	Manitoba (MB)	Central Manitoba (MB2)	7	McDonald	Spring wheat	3ADON	240	240	233	333	220	220	233	200	260	180	0.975	0.025	CL1
205	UMPPL257	Fusarium graminearum	2018	Manitoba (MB)	Central Manitoba (MB2)	7	McDonald	Spring wheat	3ADON	240	233	230	330	233	220	233	200	260	170	0.929	0.071	CL1
206	UMPPL258	Fusarium graminearum	2018	Manitoba (MB)	Central Manitoba (MB2)	7	McDonald	Spring wheat	3ADON	233	233	233	333	220	220	233	200	248	165	0.92	0.08	CL1
207	UMPPL259	Fusarium graminearum	2018	Manitoba (MB)	Central Manitoba (MB2)	7	McDonald	Spring wheat	3ADON	240	233	233	320	230	230	240	230	245	158	0.987	0.013	CL1
208	UMPPL260	Fusarium graminearum	2018	Manitoba (MB)	Central Manitoba (MB2)	7	McDonald	Spring wheat	3ADON	270	233	255	215	233	233	248	230	245	180	0.981	0.019	CL1
209	UMPPL261	Fusarium graminearum	2018	Manitoba (MB)	Central Manitoba (MB2)	7	McDonald	Spring wheat	3ADON	290	230	255	215	248	233	248	233	233	180	0.979	0.021	CL1
210	UMPPL262	Fusarium graminearum	2018	Manitoba (MB)	Central Manitoba (MB2)	7	Portage La Prairie	Spring wheat	3ADON	240	233	240	230	248	240	248	233	233	190	0.98	0.012	CL1
211	UMPPL263	Fusarium graminearum	2018	Manitoba (MB)	Central Manitoba (MB2)	7	Grey	Spring wheat	3ADON	248	233	233	215	?	240	255	220	266	190	0.557	0.443	CL1
212	UMPPL264	Fusarium graminearum	2018	Manitoba (MB)	Central Manitoba (MB2)	8	Stanley	Spring wheat	15ADON	310	266	233	255	240	220	230	233	260	230	0.962	0.038	CL1
213	UMPPL265	Fusarium graminearum	2018	Manitoba (MB)	Central Manitoba (MB2)	8	Stanley	Spring wheat	15ADON	240	230	248	366	240	230	240	240	290	233	0.894	0.106	CL1
214	UMPPL266	Fusarium graminearum	2018	Manitoba (MB)	Central Manitoba (MB2)	8	Stanley	Spring wheat	15ADON	320	240	248	185	233	230	240	248	255	233	0.954	0.046	CL1
215	UMPPL267	Fusarium graminearum	2018	Manitoba (MB)	Central Manitoba (MB2)	8	Pembina	Spring wheat	3ADON	233	210	255	333	240	240	240	266	266	166	0.973	0.027	CL1
216	UMPPL268	Fusarium graminearum	2018	Manitoba (MB)	Central Manitoba (MB2)	8	Pembina	Spring wheat	15ADON	260	240	266	185	233	233	248	266	266	233	0.951	0.049	CL1
217	UMPPL269	Fusarium graminearum	2018	Manitoba (MB)	Central Manitoba (MB2)	8	Pembina	Spring wheat	3ADON	266	230	240	333	233	240	240	266	270	200	0.921	0.079	CL1
218	UMPPL270	Fusarium graminearum	2018	Manitoba (MB)	Central Manitoba (MB2)	8	Pembina	Spring wheat	15ADON	266	260	233	180	210	230	233	230	266	230	0.985	0.015	CL1
219	UMPPL271	Fusarium graminearum	2018	Manitoba (MB)	Central Manitoba (MB2)	8	Pembina	Spring wheat	3ADON	255	233	240	320	233	240	240	233	266	220	0.781	0.219	CL1
220	UMPPL272	Fusarium graminearum	2018	Manitoba (MB)	Central Manitoba (MB2)	8	Thompson	Spring wheat	3ADON	260	233	248	366	240	248	255	248	270	175	0.986	0.014	CL1
221	UMPPL273	Fusarium graminearum	2018	Manitoba (MB)	Central Manitoba (MB2)	8	Thompson	Spring wheat	15ADON	280	240	248	200	255	240	255	248	266	248	0.967	0.033	CL1
222	UMPPL274	Fusarium graminearum	2018	Manitoba (MB)	Central Manitoba (MB2)	8	Thompson	Spring wheat	3ADON	240	230	233	255	255	255	233	255	270	200	0.352	0.648	CL2
223	UMPPL275	Fusarium graminearum	2018	Manitoba (MB)	Central Manitoba (MB2)	8	Thompson	Spring wheat	3ADON	240	233	233	248	270	255	255	266	260	200	0.969	0.031	CL1
224	UMPPL276	Fusarium graminearum	2018	Manitoba (MB)	Central Manitoba (MB2)	8	Thompson	Spring wheat	15ADON	230	233	260	280	280	240	230	266	270	220	0.943	0.057	CL1
225	UMPPL277	Fusarium graminearum	2018	Manitoba (MB)	Central Manitoba (MB2)	8	Thompson	Spring wheat	15ADON	260	240	248	233	255	240	248	270	270	240	0.957	0.043	CL1
226	UMPPL278	Fusarium graminearum	2018	Manitoba (MB)	Central Manitoba (MB2)	8	Thompson	Spring wheat	3ADON	266	233	248	366	255	248	266	266	270	175	0.971	0.029	CL1
227	UMPPL279	Fusarium graminearum	2018	Manitoba (MB)	Central Manitoba (MB2)	8	Roland	Spring wheat	3ADON	230	220	266	240	255	248	270	266	266	233	0.858	0.142	CL1
228	UMPPL280	Fusarium graminearum	2018	Manitoba (MB)	Central Manitoba (MB2)	8	Roland	Spring wheat	15ADON	266	233	240	240	270	248	255	270	270	175	0.573	0.427	CL1
229	UMPPL281	Fusarium graminearum	2018	Manitoba (MB)	Central Manitoba (MB2)	8	Roland	Spring wheat	3ADON	255	233	230	248	270	255	233	255	270	210	0.975	0.025	CL1
230	UMPPL282	Fusarium graminearum	2018	Manitoba (MB)	Central Manitoba (MB2)	8	Roland	Spring wheat	3ADON	240	233	240	366	266	255	255	255	270	210	0.975	0.025	CL1
231	UMPPL283	Fusarium graminearum	2018	Manitoba (MB)	Central Manitoba (MB2)	8	Roland	Spring wheat	3ADON	266	230	230	248	270	255	233	255	270	200	0.981	0.019	CL1
232	UMPPL284	Fusarium graminearum	2018	Manitoba (MB)	Central Manitoba (MB2)	8	Roland	Spring wheat	15ADON	270	240	233	190	266	248	240	260	270	220	0.038	0.962	CL2
233	UMPPL285	Fusarium graminearum	2018	Manitoba (MB)	Central Manitoba (MB2)	8	Roland	Spring wheat	15ADON	266	248	233	230	266	240	240	266	270	220	0.508	0.492	CL1
234	UMPPL286	Fusarium graminearum	2018	Manitoba (MB)	Central Manitoba (MB2)	8	Lorne	Spring wheat	3ADON	266	230	255	233	270	240	255	248	270	200	0.633	0.367	CL1
235	UMPPL287	Fusarium graminearum	2018	Manitoba (MB)	Central Manitoba (MB2)	8	Lorne	Spring wheat	3ADON	233	233	233	210	240	220	233	233	258	200	0.615	0.385	CL1
236	UMPPL288	Fusarium graminearum	2018	Manitoba (MB)	Central Manitoba (MB2)	8	Lorne	Spring wheat	3ADON	233	230	240	220	233	220	233	233	270	200	0.118	0.882	CL2
237	UMPPL289	Fusarium graminearum	2018	Manitoba (MB)	Central Manitoba (MB2)	8	Lorne	Spring wheat	15ADON	270	233	240	210	233	220	230	248	270	233	0.531	0.469	CL1
238	UMPPL290	Fusarium graminearum	2018	Manitoba (MB)	Central Manitoba (MB2)	8	Lorne	Spring wheat	3ADON	260	233	240	320	230	230	240	248	270	175	0.632	0.368	CL1
239	UMPPL291	Fusarium graminearum	2018	Manitoba (MB)	Central Manitoba (MB2)	8	Lorne	Spring wheat	3ADON	266	233	230	220	230	230	240	255	240	190	0.032	0.968	CL2
240	UMPPL292	Fusarium graminearum	2018	Manitoba (MB)	Central Manitoba (MB2)	8	Lorne	Spring wheat	3ADON	240	210	240	300	233	230	240	266	245	190	0.754	0.246	CL1
241	UMPPL293	Fusarium graminearum	2018	Manitoba (MB)	Central Manitoba (MB2)	8	Dufferin	Spring wheat	15ADON	260	230	248	185	233	233	233	240	266	233	0.125	0.875	CL2
242	UMPPL294	Fusarium graminearum	2018	Manitoba (MB)	Central Manitoba (MB2)	8	Dufferin	Spring wheat	15ADON	330	248	248	333	266	233	233	255	266	240	0.806	0.194	CL1
243	UMPPL295	Fusarium graminearum	2018	Manitoba (MB)	Central Manitoba (MB2)	8	Dufferin	Spring wheat	15ADON	270	240	255	185	266	233	240	255	266	240	0.979	0.021	CL1
244	UMPPL296	Fusarium graminearum	2018	Manitoba (MB)	Central Manitoba (MB2)	8	Stanley	Spring wheat	3ADON	266	230	266	233	270	240	248	270	266	166	0.351	0.649	CL2
245	UMPPL297	Fusarium graminearum	2018	Manitoba (MB)	Central Manitoba (MB2)	8	Stanley	Spring wheat	3ADON	260	248	255	333	240	240	240	240	266	200	0.454	0.546	CL2
246	UMPPL298	Fusarium graminearum	2018	Manitoba (MB)	Central Manitoba (MB2)	8	Stanley	Spring wheat	3ADON	290	230	248	200	248	230	255	230	270	166	0.745	0.255	CL1
247	UMPPL299	Fusarium graminearum	2018	Manitoba (MB)	Interlake region,Manitoba (MB3)	11	St. Andrews	Spring wheat	3ADON	266	233	230	200	260	240	260	210	280	210	0.836	0.164	CL1
248	UMPPL300	Fusarium graminearum	2018	Manitoba (MB)	Interlake region,Manitoba (MB3)	11	St. Andrews	Spring wheat	3ADON	230	230	233	300	230	230	200	210	280	175	0.885	0.115	CL1
249	UMPPL301	Fusarium graminearum	2018	Manitoba (MB)	Interlake region,Manitoba (MB3)	11	St. Andrews	Spring wheat	3ADON	233	230	233	290	240	233	240	220	260	210	0.986	0.014	CL1
250	UMPPL302	Fusarium graminearum	2018	Manitoba (MB)	Interlake region,Manitoba (MB3)	11	St. Andrews	Spring wheat	3ADON	233	230	255	210	233	233	240	230	260	200	0.98	0.02	CL1
251	UMPPL303	Fusarium graminearum	2018	Manitoba (MB)	Interlake region,Manitoba (MB3)	11	St. Andrews	Spring wheat	3ADON	260	240	233	290	240	233	240	220	260	200	0.985	0.015	CL1
252	UMPPL304	Fusarium graminearum	2018	Manitoba (MB)	Interlake region,Manitoba (MB3)	11	St. Andrews	Spring wheat	3ADON	248	233	255	300	255	230	240	233	258	200	0.981	0.019	CL1
253	UMPPL305	Fusarium graminearum	2018	Manitoba (MB)	Interlake region,Manitoba (MB3)	11	Woodlands	Spring wheat	15ADON	320	248	255	200	255	233	240	233	258	240	0.96	0.04	CL1
254	UMPPL306	Fusarium graminearum	2018	Manitoba (MB)	Interlake region,Manitoba (MB3)	11	St. Andrews	Spring wheat	3ADON	270	233	233	300	255	200	240	230	233	180	0.866	0.134	CL1
255	UMPPL307	Fusarium graminearum	2018	Manitoba (MB)	Interlake region,Manitoba (MB3)	11	St. Andrews	Spring wheat	3ADON	260	260	255	215	266	220	240	233	240	190	0.178	0.822	CL2
256	UMPPL308	Fusarium graminearum	2018	Manitoba (MB)	Interlake region,Manitoba (MB3)	11	Rockwood	Spring wheat	3ADON	240	230	255	166	255	220	230	240	258	233	0.962	0.038	CL1
257	UMPPL309	Fusarium graminearum	2018	Manitoba (MB)	Interlake region,Manitoba (MB3)	11	Woodlands	Spring wheat	3ADON	255	220	255	200	270	220	240	240	258	166	0.976	0.024	CL1
258	UMPPL310	Fusarium graminearum	2018	Manitoba (MB)	Interlake region,Manitoba (MB3)	11	Woodlands	Spring wheat	3ADON	230	230	255	290	266	230	240	240	245	190	0.967	0.033	CL1
259	UMPPL311	Fusarium graminearum	2018	Manitoba (MB)	Interlake region,Manitoba (MB3)	11	Woodlands	Spring wheat	15ADON	240	210	248	180	240	220	240	233	245	233	0.982	0.018	CL1
260	UMPPL312	Fusarium graminearum	2018	Manitoba (MB)	Interlake region,Manitoba (MB3)	11	Woodlands	Spring wheat	15ADON	240	233	248	180	266	220	230	240	245	260	0.867	0.133	CL1
261	UMPPL313	Fusarium graminearum	2018	Manitoba (MB)	Interlake region,Manitoba (MB3)	11	Woodlands	Spring wheat	15ADON	310	270	233	166	233	220	230	220	245	233	0.976	0.024	CL1
262	UMPPL314	Fusarium graminearum	2018	Manitoba (MB)	Interlake region,Manitoba (MB3)	11	Woodlands	Spring wheat	3ADON	230	230	240	200	255	233	240	230	245	166	0.172	0.828	CL2
263	UMPPL315	Fusarium graminearum	2018	Manitoba (MB)	Interlake region,Manitoba (MB3)	11	Woodlands	Spring wheat	3ADON	290	233	240	200	255	233	248	230	245	166	0.291	0.709	CL2
264	UMPPL316	Fusarium graminearum	2018	Manitoba (MB)	Interlake region,Manitoba (MB3)	11	Woodlands	Spring wheat	3ADON	230	255	230	290	248	233	248	220	220	190	0.063	0.937	CL2
265	UMPPL317	Fusarium graminearum	2018	Manitoba (MB)	Interlake region,Manitoba (MB3)	11	Woodlands	Spring wheat	3ADON	270	240	248	210	240	233	255	233	233	166	0.064	0.936	CL2
266	UMPPL318	Fusarium graminearum	2018	Manitoba (MB)	Interlake region,Manitoba (MB3)	12	Bifrost	Spring wheat	3ADON	230	230	255	330	240	230	240	240	266	190	0.972	0.028	CL1
267	UMPPL319	Fusarium graminearum	2018	Manitoba (MB)	Interlake region,Manitoba (MB3)	12	Bifrost	Spring wheat	3ADON	248	220	255	330	248	233	248	240	266	190	0.987	0.013	CL1
268	UMPPL320	Fusarium graminearum	2018	Manitoba (MB)	Interlake region,Manitoba (MB3)	12	Bifrost	Spring wheat	15ADON	220	233	255	320	248	233	248	233	245	190	0.979	0.021	CL1
269	UMPPL321	Fusarium graminearum	2018	Manitoba (MB)	Interlake region,Manitoba (MB3)	12	Bifrost	Spring wheat	15ADON	260	240	255	310	248	233	255	233	245	190	0.983	0.017	CL1
270	UMPPL322	Fusarium graminearum	2018	Manitoba (MB)	Interlake region,Manitoba (MB3)	12	Bifrost	Spring wheat	3ADON	266	240	255	300	266	233	248	240	266	166	0.979	0.021	CL1
271	UMPPL323	Fusarium graminearum	2018	Manitoba (MB)	Interlake region,Manitoba (MB3)	12	Bifrost	Spring wheat	15ADON	260	233	248	310	248	233	248	233	245	190	0.985	0.015	CL1
272	UMPPL324	Fusarium graminearum	2018	Manitoba (MB)	Interlake region,Manitoba (MB3)	12	Bifrost	Spring wheat	3ADON	233	220	233	310	248	233	248	240	266	166	0.986	0.014	CL1
273	UMPPL325	Fusarium graminearum	2018	Ontario (ON)	_	_	Woodslee	Winter wheat	15ADON	240	230	266	260	290	230	230	266	270	233	0.019	0.981	CL2
274	UMPPL326	Fusarium graminearum	2018	Ontario (ON)	_	_	Woodslee	Winter wheat	15ADON	240	220	266	255	300	230	220	266	270	230	0.038	0.962	CL2
275	UMPPL327	Fusarium graminearum	2018	Ontario (ON)	_	_	Woodslee	Winter wheat	15ADON	240	230	266	255	300	230	220	266	270	230	0.021	0.979	CL2
276	UMPPL328	Fusarium graminearum	2018	Ontario (ON)	_	_	Woodslee	Winter wheat	15ADON	240	230	266	255	300	230	220	266	270	220	0.028	0.972	CL2
277	UMPPL329	Fusarium graminearum	2018	Ontario (ON)	_	_	Woodslee	Winter wheat	15ADON	240	230	266	255	300	230	210	200	270	220	0.031	0.969	CL2
278	UMPPL330	Fusarium graminearum	2018	Ontario (ON)	_	_	Woodslee	Winter wheat	15ADON	240	220	266	255	300	220	210	200	266	210	0.091	0.909	CL2
279	UMPPL331	Fusarium graminearum	2018	Ontario (ON)	_	_	Woodslee	Winter wheat	15ADON	270	240	248	260	233	233	233	230	260	255	0.394	0.606	CL2
280	UMPPL332	Fusarium graminearum	2018	Ontario (ON)	_	_	Woodslee	Winter wheat	15ADON	266	248	255	230	210	233	266	233	260	255	0.256	0.744	CL2
281	UMPPL333	Fusarium graminearum	2018	Ontario (ON)	_	_	Woodslee	Winter wheat	15ADON	266	248	255	230	210	233	266	233	240	255	0.152	0.848	CL2
282	UMPPL334	Fusarium graminearum	2018	Ontario (ON)	_	_	Woodslee	Winter wheat	15ADON	266	248	255	220	210	233	266	240	270	240	0.109	0.891	CL2
283	UMPPL335	Fusarium graminearum	2018	Ontario (ON)	_	_	Woodslee	Winter wheat	15ADON	266	248	260	220	200	233	266	240	266	240	0.021	0.979	CL2
284	UMPPL336	Fusarium graminearum	2018	Ontario (ON)	_	_	Woodslee	Winter wheat	15ADON	266	260	260	230	200	240	266	240	266	240	0.017	0.983	CL2
285	UMPPL337	Fusarium graminearum	2018	Ontario (ON)	_	_	Woodslee	Winter wheat	15ADON	270	260	266	230	260	240	266	245	266	233	0.024	0.976	CL2
286	UMPPL338	Fusarium graminearum	2018	Ontario (ON)	_	_	Woodslee	Winter wheat	15ADON	270	260	266	230	260	240	260	245	266	233	0.091	0.909	CL2
287	UMPPL339	Fusarium graminearum	2018	Ontario (ON)	_	_	Woodslee	Winter wheat	15ADON	280	260	266	230	255	240	233	260	270	233	0.032	0.968	CL2
288	UMPPL340	Fusarium graminearum	2018	Ontario (ON)	_	_	Woodslee	Winter wheat	15ADON	266	260	266	230	240	240	233	240	266	233	0.032	0.968	CL2
289	UMPPL341	Fusarium graminearum	2018	Ontario (ON)	_	_	Woodslee	Winter wheat	15ADON	266	260	266	230	245	240	233	240	266	230	0.017	0.983	CL2
290	UMPPL342	Fusarium graminearum	2018	Ontario (ON)	_	_	Woodslee	Winter wheat	15ADON	270	260	266	230	266	245	233	240	270	240	0.014	0.986	CL2
291	UMPPL343	Fusarium graminearum	2018	Ontario (ON)	_	_	Woodslee	Winter wheat	15ADON	266	260	266	230	266	245	233	240	266	233	0.016	0.984	CL2
292	UMPPL344	Fusarium graminearum	2018	Ontario (ON)	_	_	Woodslee	Winter wheat	15ADON	260	260	266	170	245	245	255	266	270	200	0.03	0.97	CL2
293	UMPPL345	Fusarium graminearum	2018	Ontario (ON)	_	_	Woodslee	Winter wheat	15ADON	266	260	266	220	255	240	233	240	270	233	0.038	0.962	CL2
294	UMPPL346	Fusarium graminearum	2018	Ontario (ON)	_	_	Woodslee	Winter wheat	15ADON	266	260	266	220	266	233	230	255	270	?	0.02	0.972	CL2
295	UMPPL347	Fusarium graminearum	2018	Ontario (ON)	_	_	Woodslee	Winter wheat	15ADON	260	266	266	220	266	240	220	255	270	230	0.028	0.972	CL2
296	UMPPL348	Fusarium graminearum	2018	Ontario (ON)	_	_	Woodslee	Winter wheat	15ADON	258	266	266	220	266	240	233	255	270	233	0.019	0.981	CL2
297	UMPPL349	Fusarium graminearum	2018	Ontario (ON)	_	_	Woodslee	Winter wheat	15ADON	245	260	266	220	266	240	233	245	266	230	0.023	0.977	CL2
298	UMPPL350	Fusarium graminearum	2018	Ontario (ON)	_	_	Woodslee	Winter wheat	15ADON	240	260	260	220	266	230	230	248	266	230	0.044	0.956	CL2
299	UMPPL351	Fusarium graminearum	2018	Ontario (ON)	_	_	Woodslee	Winter wheat	15ADON	240	260	240	220	245	230	230	245	260	230	0.028	0.972	CL2
300	UMPPL352	Fusarium graminearum	2018	Ontario (ON)	_	_	Woodslee	Winter wheat	15ADON	233	230	240	220	245	220	220	248	260	230	0.524	0.476	CL2
301	UMPPL353	Fusarium graminearum	2018	Ontario (ON)	_	_	Woodslee	Winter wheat	15ADON	240	230	240	220	245	200	220	200	260	230	0.178	0.822	CL2
302	UMPPL354	Fusarium graminearum	2018	Ontario (ON)	_	_	Woodslee	Winter wheat	15ADON	233	230	240	220	240	230	240	230	266	240	0.28	0.72	CL2
303	UMPPL355	Fusarium graminearum	2018	Ontario (ON)	_	_	Woodslee	Winter wheat	15ADON	240	233	248	220	260	230	245	230	266	245	0.097	0.903	CL2
304	UMPPL356	Fusarium graminearum	2018	Ontario (ON)	_	_	Woodslee	Winter wheat	15ADON	233	233	255	230	260	220	248	233	266	245	0.286	0.714	CL2
305	UMPPL357	Fusarium graminearum	2018	Ontario (ON)	_	_	Ridgetown	Winter wheat	15ADON	260	240	260	260	240	220	248	233	266	233	0.105	0.895	CL2
306	UMPPL358	Fusarium graminearum	2018	Ontario (ON)	_	_	Ridgetown	Winter wheat	15ADON	260	240	266	260	260	220	248	233	266	240	0.057	0.943	CL2
307	UMPPL359	Fusarium graminearum	2018	Ontario (ON)	_	_	Ridgetown	Winter wheat	15ADON	260	240	266	260	258	220	248	233	266	240	0.048	0.952	CL2
308	UMPPL360	Fusarium graminearum	2018	Ontario (ON)	_	_	Ridgetown	Winter wheat	15ADON	248	255	266	260	258	210	248	230	266	240	0.065	0.935	CL2
309	UMPPL361	Fusarium graminearum	2018	Ontario (ON)	_	_	Ridgetown	Winter wheat	15ADON	255	255	270	260	240	210	248	230	266	240	0.053	0.947	CL2
310	UMPPL362	Fusarium graminearum	2018	Ontario (ON)	_	_	Ridgetown	Winter wheat	15ADON	220	240	266	230	233	210	266	233	290	240	0.03	0.97	CL2
311	UMPPL363	Fusarium graminearum	2018	Ontario (ON)	_	_	Ridgetown	Winter wheat	15ADON	220	240	270	230	240	200	266	233	280	240	0.017	0.983	CL2
312	UMPPL364	Fusarium graminearum	2018	Ontario (ON)	_	_	Ridgetown	Winter wheat	15ADON	220	240	270	230	240	200	266	230	270	240	0.023	0.977	CL2
313	UMPPL365	Fusarium graminearum	2018	Ontario (ON)	_	_	Ridgetown	Winter wheat	15ADON	290	248	290	230	248	200	240	220	260	240	0.066	0.934	CL2
314	UMPPL366	Fusarium graminearum	2018	Ontario (ON)	_	_	Ridgetown	Winter wheat	15ADON	290	248	290	230	240	200	240	230	260	233	0.088	0.912	CL2
315	UMPPL367	Fusarium graminearum	2018	Ontario (ON)	_	_	Ridgetown	Winter wheat	15ADON	220	260	270	260	240	200	233	233	266	266	0.011	0.989	CL2
316	UMPPL368	Fusarium graminearum	2018	Ontario (ON)	_	_	Ridgetown	Winter wheat	15ADON	220	260	270	260	240	200	230	233	266	266	0.01	0.99	CL2
317	UMPPL369	Fusarium graminearum	2018	Ontario (ON)	_	_	Ridgetown	Winter wheat	15ADON	210	266	270	260	240	200	230	233	266	266	0.01	0.99	CL2
318	UMPPL370	Fusarium graminearum	2018	Ontario (ON)	_	_	Ridgetown	Winter wheat	15ADON	210	240	270	260	233	190	230	233	270	266	0.014	0.986	CL2
319	UMPPL371	Fusarium graminearum	2018	Ontario (ON)	_	_	Ridgetown	Winter wheat	15ADON	220	270	280	260	240	190	230	210	270	270	0.01	0.99	CL2
320	UMPPL372	Fusarium graminearum	2018	Ontario (ON)	_	_	Ridgetown	Winter wheat	15ADON	220	240	280	255	240	190	230	240	270	266	0.012	0.988	CL2
321	UMPPL373	Fusarium graminearum	2018	Ontario (ON)	_	_	Ridgetown	Winter wheat	15ADON	220	270	280	255	240	190	230	240	270	266	0.009	0.991	CL2
322	UMPPL374	Fusarium graminearum	2018	Ontario (ON)	_	_	Ridgetown	Winter wheat	15ADON	230	240	290	240	240	190	230	240	290	270	0.012	0.988	CL2
323	UMPPL375	Fusarium graminearum	2018	Ontario (ON)	_	_	Ridgetown	Winter wheat	15ADON	233	266	290	220	248	190	230	210	270	200	0.019	0.981	CL2
324	UMPPL376	Fusarium graminearum	2018	Ontario (ON)	_	_	Elora	Winter wheat	15ADON	210	233	290	170	240	190	240	240	270	210	0.044	0.956	CL2
325	UMPPL377	Fusarium graminearum	2018	Ontario (ON)	_	_	Elora	Winter wheat	15ADON	260	266	280	190	233	180	240	210	270	266	0.019	0.981	CL2
326	UMPPL378	Fusarium graminearum	2018	Ontario (ON)	_	_	Elora	Winter wheat	15ADON	266	240	266	180	233	220	200	230	240	245	0.035	0.965	CL2
327	UMPPL379	Fusarium graminearum	2018	Ontario (ON)	_	_	Elora	Winter wheat	15ADON	230	233	270	220	266	230	210	240	260	210	0.367	0.633	CL2
328	UMPPL380	Fusarium graminearum	2018	Ontario (ON)	_	_	Elora	Winter wheat	15ADON	230	233	266	220	266	230	220	240	266	220	0.165	0.835	CL2
329	UMPPL381	Fusarium graminearum	2018	Ontario (ON)	_	_	Elora	Winter wheat	15ADON	290	255	266	190	260	220	230	230	266	266	0.012	0.988	CL2
330	UMPPL382	Fusarium graminearum	2018	Ontario (ON)	_	_	Elora	Winter wheat	15ADON	233	240	266	233	260	220	260	240	266	230	0.178	0.822	CL2
331	UMPPL383	Fusarium graminearum	2018	Ontario (ON)	_	_	Elora	Winter wheat	15ADON	266	266	270	233	266	220	280	230	270	240	0.014	0.986	CL2
332	UMPPL384	Fusarium graminearum	2018	Ontario (ON)	_	_	Elora	Winter wheat	15ADON	266	266	270	240	266	230	280	230	270	245	0.013	0.987	CL2
333	UMPPL385	Fusarium graminearum	2018	Ontario (ON)	_	_	Elora	Winter wheat	15ADON	255	260	266	320	260	230	266	220	270	260	0.028	0.972	CL2
334	UMPPL386	Fusarium graminearum	2019	Saskatchewan (SK)	Southern Saskatchewan (SK2)	1A	Argyle	Spring wheat	15ADON	230	255	260	233	240	233	210	255	240	220	0.91	0.09	CL1
335	UMPPL387	Fusarium graminearum	2019	Saskatchewan (SK)	Southern Saskatchewan (SK2)	1A	Argyle	Spring wheat	15ADON	240	260	240	233	255	233	233	240	270	266	0.752	0.248	CL1
336	UMPPL388	Fusarium graminearum	2019	Saskatchewan (SK)	Southern Saskatchewan (SK2)	1A	Argyle	Spring wheat	15ADON	230	255	240	233	240	233	200	245	240	260	0.657	0.343	CL1
337	UMPPL389	Fusarium graminearum	2019	Saskatchewan (SK)	Southern Saskatchewan (SK2)	1A	Argyle	Spring wheat	15ADON	210	240	240	233	233	233	200	245	240	233	0.531	0.469	CL1
338	UMPPL390	Fusarium graminearum	2019	Saskatchewan (SK)	Southern Saskatchewan (SK2)	1A	Argyle	Spring wheat	15ADON	233	230	240	220	233	230	230	220	245	260	0.702	0.298	CL1
339	UMPPL391	Fusarium graminearum	2019	Saskatchewan (SK)	Southern Saskatchewan (SK2)	1A	Argyle	Spring wheat	15ADON	240	233	240	220	240	230	233	230	266	260	0.029	0.971	CL2
340	UMPPL392	Fusarium graminearum	2019	Saskatchewan (SK)	Southern Saskatchewan (SK2)	1A	Argyle	Spring wheat	3ADON	240	233	240	320	266	233	248	210	266	220	0.442	0.558	CL2
341	UMPPL393	Fusarium graminearum	2019	Saskatchewan (SK)	Southern Saskatchewan (SK2)	1A	Argyle	Spring wheat	15ADON	233	240	240	220	240	233	233	233	260	260	0.693	0.307	CL1
342	UMPPL394	Fusarium graminearum	2019	Saskatchewan (SK)	Southern Saskatchewan (SK2)	1A	Argyle	Spring wheat	15ADON	233	245	240	230	245	220	233	233	260	260	0.407	0.593	CL2
343	UMPPL395	Fusarium graminearum	2019	Saskatchewan (SK)	Southern Saskatchewan (SK2)	1A	Argyle	Spring wheat	3ADON	240	240	240	320	270	240	248	230	270	230	0.613	0.387	CL1
344	UMPPL396	Fusarium graminearum	2019	Saskatchewan (SK)	Southern Saskatchewan (SK2)	1A	Storthoaks	Spring wheat	3ADON	240	240	240	240	266	230	248	240	270	180	0.521	0.479	CL1
345	UMPPL397	Fusarium graminearum	2019	Saskatchewan (SK)	Southern Saskatchewan (SK2)	1A	Storthoaks	Spring wheat	3ADON	260	255	240	240	266	245	266	245	300	180	0.74	0.255	CL1
346	UMPPL398	Fusarium graminearum	2019	Saskatchewan (SK)	Southern Saskatchewan (SK2)	1A	Storthoaks	Spring wheat	15ADON	333	270	240	233	245	240	255	240	300	230	0.583	0.417	CL1
347	UMPPL399	Fusarium graminearum	2019	Saskatchewan (SK)	Southern Saskatchewan (SK2)	1A	Storthoaks	Spring wheat	15ADON	240	260	220	180	240	233	240	233	270	220	0.804	0.196	CL1
348	UMPPL400	Fusarium graminearum	2019	Saskatchewan (SK)	Southern Saskatchewan (SK2)	1A	Storthoaks	Spring wheat	15ADON	248	260	220	190	240	233	240	233	270	220	0.95	0.05	CL1
349	UMPPL401	Fusarium graminearum	2019	Saskatchewan (SK)	Southern Saskatchewan (SK2)	1A	Storthoaks	Spring wheat	3ADON	248	245	245	320	266	230	255	245	280	220	0.911	0.089	CL1
350	UMPPL402	Fusarium graminearum	2019	Saskatchewan (SK)	Southern Saskatchewan (SK2)	1A	Storthoaks	Spring wheat	3ADON	260	245	245	290	240	245	255	220	270	210	0.03	0.97	CL2
351	UMPPL403	Fusarium graminearum	2019	Saskatchewan (SK)	Southern Saskatchewan (SK2)	1A	Storthoaks	Spring wheat	15ADON	320	270	240	233	240	245	240	245	270	240	0.026	0.974	CL2
352	UMPPL404	Fusarium graminearum	2019	Saskatchewan (SK)	Southern Saskatchewan (SK2)	1A	Antler	Spring wheat	3ADON	240	240	240	233	270	240	266	240	266	233	0.182	0.818	CL2
353	UMPPL405	Fusarium graminearum	2019	Saskatchewan (SK)	Southern Saskatchewan (SK2)	1A	Antler	Spring wheat	3ADON	240	233	240	230	270	230	240	220	240	210	0.223	0.777	CL2
354	UMPPL406	Fusarium graminearum	2019	Saskatchewan (SK)	Southern Saskatchewan (SK2)	1A	Antler	Spring wheat	3ADON	240	248	240	310	233	240	266	240	266	220	0.184	0.816	CL2
355	UMPPL407	Fusarium graminearum	2019	Saskatchewan (SK)	Southern Saskatchewan (SK2)	1A	Antler	Spring wheat	3ADON	245	248	240	320	240	240	266	245	240	210	0.201	0.799	CL2
356	UMPPL408	Fusarium graminearum	2019	Saskatchewan (SK)	Southern Saskatchewan (SK2)	1A	Antler	Spring wheat	3ADON	266	240	233	240	240	240	266	245	266	210	0.051	0.949	CL2
357	UMPPL409	Fusarium graminearum	2019	Saskatchewan (SK)	Southern Saskatchewan (SK2)	1A	Antler	Spring wheat	3ADON	240	240	245	310	255	255	266	245	290	170	0.033	0.967	CL2
358	UMPPL410	Fusarium graminearum	2019	Saskatchewan (SK)	Southern Saskatchewan (SK2)	1A	Antler	Spring wheat	3ADON	260	220	245	310	266	240	266	245	245	?	0.034	0.966	CL2
359	UMPPL411	Fusarium graminearum	2019	Saskatchewan (SK)	Southern Saskatchewan (SK2)	1A	Antler	Spring wheat	3ADON	245	245	245	320	240	240	266	240	266	200	0.099	0.901	CL2
360	UMPPL412	Fusarium graminearum	2019	Saskatchewan (SK)	Southern Saskatchewan (SK2)	1A	Antler	Spring wheat	3ADON	240	230	245	320	220	240	266	240	245	200	0.017	0.983	CL2
361	UMPPL413	Fusarium graminearum	2019	Saskatchewan (SK)	Southern Saskatchewan (SK2)	1A	Antler	Spring wheat	3ADON	240	233	233	220	266	230	240	220	260	160	0.025	0.975	CL2
362	UMPPL414	Fusarium graminearum	2019	Saskatchewan (SK)	Southern Saskatchewan (SK2)	1B	Moosomin	Spring wheat	3ADON	260	233	266	240	233	233	240	230	266	160	0.787	0.213	CL1
363	UMPPL415	Fusarium graminearum	2019	Saskatchewan (SK)	Southern Saskatchewan (SK2)	1B	Moosomin	Spring wheat	3ADON	255	233	266	320	200	233	240	233	266	160	0.533	0.467	CL1
364	UMPPL416	Fusarium graminearum	2019	Saskatchewan (SK)	Southern Saskatchewan (SK2)	1B	Moosomin	Spring wheat	3ADON	248	233	270	240	210	230	240	230	266	160	0.628	0.372	CL1
365	UMPPL417	Fusarium graminearum	2019	Saskatchewan (SK)	Southern Saskatchewan (SK2)	1B	Moosomin	Spring wheat	3ADON	248	230	266	240	270	233	240	240	?	160	0.75	0.242	CL1
366	UMPPL418	Fusarium graminearum	2019	Saskatchewan (SK)	Southern Saskatchewan (SK2)	1B	Moosomin	Spring wheat	3ADON	255	230	266	333	260	233	240	233	266	160	0.617	0.383	CL1
367	UMPPL419	Fusarium graminearum	2019	Saskatchewan (SK)	Southern Saskatchewan (SK2)	1B	Moosomin	Spring wheat	3ADON	260	230	266	333	270	233	240	233	266	160	0.799	0.201	CL1
368	UMPPL420	Fusarium graminearum	2019	Saskatchewan (SK)	Southern Saskatchewan (SK2)	1B	Moosomin	Spring wheat	3ADON	260	230	266	260	270	233	240	240	266	160	0.525	0.475	CL1
369	UMPPL421	Fusarium graminearum	2019	Saskatchewan (SK)	Southern Saskatchewan (SK2)	1B	Moosomin	Spring wheat	3ADON	260	230	266	333	270	233	240	233	266	160	0.804	0.196	CL1
370	UMPPL422	Fusarium graminearum	2019	Saskatchewan (SK)	Southern Saskatchewan (SK2)	1B	Moosomin	Spring wheat	3ADON	266	230	266	333	270	233	240	240	266	180	0.821	0.179	CL1
371	UMPPL423	Fusarium graminearum	2019	Saskatchewan (SK)	Southern Saskatchewan (SK2)	1B	Martin	Spring wheat	3ADON	233	233	266	310	233	230	233	220	266	160	0.772	0.228	CL1
372	UMPPL424	Fusarium graminearum	2019	Manitoba (MB)	Southwest Manitoba (MB1)	1	Killarney-Turtle Mountain	Spring wheat	3ADON	230	258	266	240	266	230	245	230	270	240	0.017	0.983	CL2
373	UMPPL425	Fusarium graminearum	2019	Manitoba (MB)	Southwest Manitoba (MB1)	1	Killarney-Turtle Mountain	Spring wheat	15ADON	260	270	266	230	300	230	233	245	270	260	0.024	0.976	CL2
374	UMPPL426	Fusarium graminearum	2019	Manitoba (MB)	Southwest Manitoba (MB1)	1	Killarney-Turtle Mountain	Spring wheat	3ADON	220	245	266	190	266	230	233	233	270	210	0.217	0.783	CL2
375	UMPPL427	Fusarium graminearum	2019	Manitoba (MB)	Southwest Manitoba (MB1)	1	Killarney-Turtle Mountain	Spring wheat	15ADON	240	266	266	320	310	230	200	233	270	245	0.02	0.98	CL2
376	UMPPL428	Fusarium graminearum	2019	Manitoba (MB)	Southwest Manitoba (MB1)	1	Sthracona	Spring wheat	15ADON	240	270	266	266	320	230	230	233	260	230	0.038	0.962	CL2
377	UMPPL429	Fusarium graminearum	2019	Manitoba (MB)	Southwest Manitoba (MB1)	1	Killarney-Turtle Mountain	Spring wheat	3ADON	210	245	266	220	270	220	233	233	260	200	0.862	0.138	CL1
378	UMPPL430	Fusarium graminearum	2019	Manitoba (MB)	Southwest Manitoba (MB1)	1	Killarney-Turtle Mountain	Spring wheat	15ADON	260	240	240	180	240	240	233	233	266	200	0.755	0.245	CL1
379	UMPPL431	Fusarium graminearum	2019	Manitoba (MB)	Southwest Manitoba (MB1)	1	Killarney-Turtle Mountain	Spring wheat	15ADON	270	240	248	210	320	233	240	233	233	230	0.845	0.155	CL1
380	UMPPL432	Fusarium graminearum	2019	Manitoba (MB)	Southwest Manitoba (MB1)	1	Killarney-Turtle Mountain	Spring wheat	15ADON	270	255	248	220	266	245	220	245	260	230	0.779	0.221	CL1
381	UMPPL433	Fusarium graminearum	2019	Manitoba (MB)	Southwest Manitoba (MB1)	1	Killarney-Turtle Mountain	Spring wheat	15ADON	233	270	270	190	290	210	230	233	270	240	0.645	0.355	CL1
382	UMPPL434	Fusarium graminearum	2019	Manitoba (MB)	Southwest Manitoba (MB1)	1	Killarney-Turtle Mountain	Spring wheat	3ADON	230	248	266	233	280	220	240	233	270	230	0.646	0.354	CL1
383	UMPPL435	Fusarium graminearum	2019	Manitoba (MB)	Southwest Manitoba (MB1)	1	Killarney-Turtle Mountain	Spring wheat	15ADON	270	245	266	210	355	210	240	233	266	240	0.93	0.07	CL1
384	UMPPL436	Fusarium graminearum	2019	Manitoba (MB)	Southwest Manitoba (MB1)	1	Killarney-Turtle Mountain	Spring wheat	3ADON	233	240	260	266	270	210	233	233	270	220	0.874	0.126	CL1
385	UMPPL437	Fusarium graminearum	2019	Manitoba (MB)	Southwest Manitoba (MB1)	1	Killarney-Turtle Mountain	Spring wheat	3ADON	233	240	255	310	245	230	240	230	233	200	0.85	0.15	CL1
386	UMPPL438	Fusarium graminearum	2019	Manitoba (MB)	Southwest Manitoba (MB1)	1	Killarney-Turtle Mountain	Spring wheat	3ADON	230	240	233	266	245	233	240	200	260	200	0.045	0.955	CL2
387	UMPPL439	Fusarium graminearum	2019	Manitoba (MB)	Southwest Manitoba (MB1)	1	Killarney-Turtle Mountain	Spring wheat	15ADON	270	248	255	220	245	233	220	240	260	230	0.278	0.722	CL2
388	UMPPL440	Fusarium graminearum	2019	Manitoba (MB)	Southwest Manitoba (MB1)	1	Killarney-Turtle Mountain	Spring wheat	15ADON	270	248	255	210	260	233	220	240	260	230	0.099	0.901	CL2
389	UMPPL441	Fusarium graminearum	2019	Manitoba (MB)	Southwest Manitoba (MB1)	1	Morton	Spring wheat	3ADON	220	240	240	320	266	233	240	240	260	200	0.055	0.945	CL2
390	UMPPL442	Fusarium graminearum	2019	Manitoba (MB)	Southwest Manitoba (MB1)	1	Morton	Spring wheat	3ADON	220	240	255	230	266	233	240	240	260	160	0.012	0.988	CL2
391	UMPPL443	Fusarium graminearum	2019	Manitoba (MB)	Southwest Manitoba (MB1)	1	Morton	Spring wheat	3ADON	220	245	248	310	266	233	233	240	260	160	0.016	0.984	CL2
392	UMPPL444	Fusarium graminearum	2019	Manitoba (MB)	Southwest Manitoba (MB1)	1	Morton	Spring wheat	3ADON	220	245	248	310	266	233	233	240	260	160	0.025	0.975	CL2
393	UMPPL445	Fusarium graminearum	2019	Manitoba (MB)	Southwest Manitoba (MB1)	1	Morton	Spring wheat	3ADON	220	245	233	310	233	230	233	230	233	190	0.009	0.991	CL2
394	UMPPL446	Fusarium graminearum	2019	Manitoba (MB)	Southwest Manitoba (MB1)	1	Morton	Spring wheat	15ADON	233	266	248	180	233	230	230	233	255	230	0.059	0.941	CL2
395	UMPPL447	Fusarium graminearum	2019	Manitoba (MB)	Southwest Manitoba (MB1)	1	Morton	Spring wheat	3ADON	220	245	255	310	230	230	233	210	255	190	0.299	0.701	CL2
396	UMPPL448	Fusarium graminearum	2019	Manitoba (MB)	Southwest Manitoba (MB1)	1	Winclester	Spring wheat	3ADON	220	245	233	233	255	230	233	240	233	190	0.379	0.621	CL2
397	UMPPL449	Fusarium graminearum	2019	Manitoba (MB)	Southwest Manitoba (MB1)	1	Winclester	Spring wheat	15ADON	225	245	255	180	233	233	233	240	258	160	0.166	0.834	CL2
398	UMPPL450	Fusarium graminearum	2019	Manitoba (MB)	Southwest Manitoba (MB1)	1	Winclester	Spring wheat	3ADON	220	240	260	233	260	233	230	240	233	200	0.424	0.576	CL2
399	UMPPL451	Fusarium graminearum	2019	Manitoba (MB)	Southwest Manitoba (MB1)	1	Winclester	Spring wheat	3ADON	220	240	260	310	240	240	230	233	260	210	0.044	0.956	CL2
400	UMPPL452	Fusarium graminearum	2019	Manitoba (MB)	Southwest Manitoba (MB1)	1	Winclester	Spring wheat	3ADON	220	245	260	320	248	233	230	240	255	200	0.026	0.974	CL2
401	UMPPL453	Fusarium graminearum	2019	Manitoba (MB)	Southwest Manitoba (MB1)	1	Winclester	Spring wheat	3ADON	225	255	260	320	240	240	230	233	245	210	0.153	0.847	CL2
402	UMPPL454	Fusarium graminearum	2019	Manitoba (MB)	Southwest Manitoba (MB1)	1	Winclester	Spring wheat	15ADON	266	255	260	233	240	233	190	255	240	230	0.023	0.977	CL2
403	UMPPL455	Fusarium graminearum	2019	Manitoba (MB)	Southwest Manitoba (MB1)	2	South Cypress	Spring wheat	15ADON	230	255	233	258	290	220	210	210	260	180	0.798	0.202	CL1
404	UMPPL456	Fusarium graminearum	2019	Manitoba (MB)	Southwest Manitoba (MB1)	2	South Cypress	Spring wheat	3ADON	230	260	240	300	266	230	233	190	240	190	0.982	0.018	CL1
405	UMPPL457	Fusarium graminearum	2019	Manitoba (MB)	Southwest Manitoba (MB1)	2	Elton	Spring wheat	3ADON	233	233	240	300	233	233	240	220	240	200	0.981	0.019	CL1
406	UMPPL458	Fusarium graminearum	2019	Manitoba (MB)	Southwest Manitoba (MB1)	2	Elton	Spring wheat	3ADON	240	230	233	310	233	233	240	220	240	200	0.985	0.015	CL1
407	UMPPL459	Fusarium graminearum	2019	Manitoba (MB)	Southwest Manitoba (MB1)	2	Elton	Spring wheat	15ADON	240	233	233	233	240	233	240	230	240	200	0.972	0.028	CL1
408	UMPPL460	Fusarium graminearum	2019	Manitoba (MB)	Southwest Manitoba (MB1)	2	Elton	Spring wheat	3ADON	240	233	233	300	233	240	240	220	240	210	0.956	0.044	CL1
409	UMPPL461	Fusarium graminearum	2019	Manitoba (MB)	Southwest Manitoba (MB1)	2	Elton	Spring wheat	3ADON	233	240	240	310	233	240	248	220	240	210	0.974	0.026	CL1
410	UMPPL462	Fusarium graminearum	2019	Manitoba (MB)	Southwest Manitoba (MB1)	2	Elton	Spring wheat	3ADON	248	190	240	310	233	233	240	210	233	210	0.988	0.012	CL1
411	UMPPL463	Fusarium graminearum	2019	Manitoba (MB)	Southwest Manitoba (MB1)	2	Elton	Spring wheat	3ADON	240	233	233	310	233	240	233	210	233	210	0.988	0.012	CL1
412	UMPPL464	Fusarium graminearum	2019	Manitoba (MB)	Southwest Manitoba (MB1)	2	Daly	Spring wheat	3ADON	248	233	230	320	240	233	240	190	255	210	0.962	0.038	CL1
413	UMPPL465	Fusarium graminearum	2019	Manitoba (MB)	Southwest Manitoba (MB1)	2	Daly	Spring wheat	3ADON	248	233	230	320	240	233	240	190	255	210	0.965	0.035	CL1
414	UMPPL466	Fusarium graminearum	2019	Manitoba (MB)	Southwest Manitoba (MB1)	2	Daly	Spring wheat	3ADON	240	230	220	320	233	233	240	180	240	210	0.975	0.025	CL1
415	UMPPL467	Fusarium graminearum	2019	Manitoba (MB)	Southwest Manitoba (MB1)	2	Daly	Spring wheat	3ADON	240	230	220	320	233	233	240	180	240	210	0.929	0.071	CL1
416	UMPPL468	Fusarium graminearum	2019	Manitoba (MB)	Southwest Manitoba (MB1)	2	Daly	Spring wheat	3ADON	240	220	230	320	233	233	245	190	240	210	0.958	0.042	CL1
417	UMPPL469	Fusarium graminearum	2019	Manitoba (MB)	Southwest Manitoba (MB1)	2	Daly	Spring wheat	3ADON	248	230	220	320	233	233	245	190	260	230	0.957	0.043	CL1
418	UMPPL470	Fusarium graminearum	2019	Manitoba (MB)	Southwest Manitoba (MB1)	2	Daly	Spring wheat	3ADON	233	220	230	320	233	230	240	180	240	230	0.981	0.019	CL1
419	UMPPL471	Fusarium graminearum	2019	Manitoba (MB)	Southwest Manitoba (MB1)	2	Daly	Spring wheat	3ADON	240	220	200	320	233	233	248	180	245	230	0.859	0.141	CL1
420	UMPPL472	Fusarium graminearum	2019	Manitoba (MB)	Southwest Manitoba (MB1)	2	Daly	Spring wheat	3ADON	248	220	220	320	233	240	248	190	260	233	0.99	0.01	CL1
421	UMPPL473	Fusarium graminearum	2019	Manitoba (MB)	Southwest Manitoba (MB1)	2	Pipestone	Spring wheat	3ADON	245	220	233	240	210	240	240	220	260	233	0.978	0.022	CL1
422	UMPPL474	Fusarium graminearum	2019	Manitoba (MB)	Southwest Manitoba (MB1)	2	Pipestone	Spring wheat	3ADON	240	230	266	233	210	233	240	233	255	230	0.844	0.156	CL1
423	UMPPL475	Fusarium graminearum	2019	Manitoba (MB)	Southwest Manitoba (MB1)	2	Pipestone	Spring wheat	3ADON	240	233	266	233	210	233	240	233	260	200	0.905	0.095	CL1
424	UMPPL476	Fusarium graminearum	2019	Manitoba (MB)	Southwest Manitoba (MB1)	2	Pipestone	Spring wheat	3ADON	248	233	266	233	210	233	240	233	260	160	0.895	0.105	CL1
425	UMPPL477	Fusarium graminearum	2019	Manitoba (MB)	Southwest Manitoba (MB1)	2	Pipestone	Spring wheat	3ADON	248	220	233	248	233	240	248	220	266	190	0.744	0.256	CL1
426	UMPPL478	Fusarium graminearum	2019	Manitoba (MB)	Southwest Manitoba (MB1)	2	Pipestone	Spring wheat	3ADON	240	220	210	248	233	240	240	220	260	233	0.283	0.717	CL2
427	UMPPL479	Fusarium graminearum	2019	Manitoba (MB)	Southwest Manitoba (MB1)	2	Pipestone	Spring wheat	3ADON	233	220	233	255	210	240	240	220	260	233	0.796	0.204	CL1
428	UMPPL480	Fusarium graminearum	2019	Manitoba (MB)	Southwest Manitoba (MB1)	2	Pipestone	Spring wheat	3ADON	240	220	210	260	233	233	240	210	260	233	0.83	0.17	CL1
429	UMPPL481	Fusarium graminearum	2019	Manitoba (MB)	Southwest Manitoba (MB1)	2	Pipestone	Spring wheat	3ADON	233	220	233	260	210	233	240	210	260	180	0.061	0.939	CL2
430	UMPPL482	Fusarium graminearum	2019	Manitoba (MB)	Southwest Manitoba (MB1)	2	Pipestone	Spring wheat	3ADON	240	230	248	230	240	220	233	233	245	200	0.963	0.037	CL1
431	UMPPL483	Fusarium graminearum	2019	Manitoba (MB)	Southwest Manitoba (MB1)	2	Pipestone	Spring wheat	15ADON	240	230	266	233	270	220	233	233	230	210	0.163	0.837	CL2
432	UMPPL484	Fusarium graminearum	2019	Manitoba (MB)	Southwest Manitoba (MB1)	3	Prairie View	Spring wheat	3ADON	266	220	240	333	270	230	240	240	230	210	0.828	0.172	CL1
433	UMPPL485	Fusarium graminearum	2019	Manitoba (MB)	Southwest Manitoba (MB1)	3	Prairie View	Spring wheat	3ADON	255	190	233	320	266	220	230	210	240	210	0.514	0.486	CL1
434	UMPPL486	Fusarium graminearum	2019	Manitoba (MB)	Southwest Manitoba (MB1)	3	Prairie View	Spring wheat	3ADON	248	190	233	320	260	220	240	210	230	210	0.342	0.658	CL2
435	UMPPL487	Fusarium graminearum	2019	Manitoba (MB)	Southwest Manitoba (MB1)	3	Prairie View	Spring wheat	15ADON	270	230	266	240	270	220	220	233	266	230	0.359	0.641	CL2
436	UMPPL488	Fusarium graminearum	2019	Manitoba (MB)	Southwest Manitoba (MB1)	3	Prairie View	Spring wheat	15ADON	270	230	240	240	270	230	220	230	260	230	0.6	0.4	CL1
437	UMPPL489	Fusarium graminearum	2019	Manitoba (MB)	Southwest Manitoba (MB1)	3	Prairie View	Spring wheat	3ADON	260	200	240	320	266	230	233	233	260	210	0.658	0.342	CL1
438	UMPPL490	Fusarium graminearum	2019	Manitoba (MB)	Southwest Manitoba (MB1)	3	Prairie View	Spring wheat	3ADON	260	200	240	320	266	220	230	233	233	210	0.45	0.55	CL2
439	UMPPL491	Fusarium graminearum	2019	Manitoba (MB)	Southwest Manitoba (MB1)	3	Prairie View	Spring wheat	3ADON	258	200	240	320	266	220	240	230	233	210	0.412	0.588	CL2
440	UMPPL492	Fusarium graminearum	2019	Manitoba (MB)	Southwest Manitoba (MB1)	3	Prairie View	Spring wheat	15ADON	266	200	260	230	266	220	210	210	233	230	0.92	0.08	CL1
441	UMPPL493	Fusarium graminearum	2019	Manitoba (MB)	Southwest Manitoba (MB1)	3	Blanshard	Spring wheat	15ADON	266	260	266	240	240	230	240	220	266	200	0.76	0.24	CL1
442	UMPPL494	Fusarium graminearum	2019	Manitoba (MB)	Southwest Manitoba (MB1)	3	Blanshard	Spring wheat	15ADON	266	260	266	245	240	230	240	220	266	200	0.231	0.769	CL2
443	UMPPL495	Fusarium graminearum	2019	Manitoba (MB)	Southwest Manitoba (MB1)	3	Blanshard	Spring wheat	15ADON	266	248	266	240	240	230	240	220	266	200	0.96	0.04	CL1
444	UMPPL496	Fusarium graminearum	2019	Manitoba (MB)	Southwest Manitoba (MB1)	3	Blanshard	Spring wheat	3ADON	240	233	266	230	266	233	245	233	240	210	0.956	0.044	CL1
445	UMPPL497	Fusarium graminearum	2019	Manitoba (MB)	Southwest Manitoba (MB1)	3	Blanshard	Spring wheat	3ADON	233	233	266	233	266	233	245	233	240	210	0.864	0.136	CL1
446	UMPPL498	Fusarium graminearum	2019	Manitoba (MB)	Southwest Manitoba (MB1)	3	Blanshard	Spring wheat	3ADON	233	233	266	233	266	233	248	233	248	210	0.879	0.121	CL1
447	UMPPL499	Fusarium graminearum	2019	Manitoba (MB)	Southwest Manitoba (MB1)	3	Odanah	Spring wheat	3ADON	233	230	248	266	240	230	245	230	260	210	0.861	0.139	CL1
448	UMPPL500	Fusarium graminearum	2019	Manitoba (MB)	Southwest Manitoba (MB1)	3	Odanah	Spring wheat	3ADON	233	230	240	255	240	255	240	230	245	200	0.945	0.055	CL1
449	UMPPL501	Fusarium graminearum	2019	Manitoba (MB)	Southwest Manitoba (MB1)	3	Odanah	Spring wheat	15ADON	230	230	266	270	230	255	220	230	255	230	0.835	0.165	CL1
450	UMPPL502	Fusarium graminearum	2019	Manitoba (MB)	Southwest Manitoba (MB1)	3	Odanah	Spring wheat	3ADON	233	240	248	255	233	240	245	220	260	200	0.773	0.227	CL1
451	UMPPL503	Fusarium graminearum	2019	Manitoba (MB)	Southwest Manitoba (MB1)	3	Odanah	Spring wheat	3ADON	233	230	248	266	258	233	245	230	266	210	0.489	0.511	CL2
452	UMPPL504	Fusarium graminearum	2019	Manitoba (MB)	Southwest Manitoba (MB1)	3	Odanah	Spring wheat	3ADON	233	220	266	300	233	233	245	220	260	210	0.816	0.184	CL1
453	UMPPL505	Fusarium graminearum	2019	Manitoba (MB)	Southwest Manitoba (MB1)	3	Odanah	Spring wheat	3ADON	233	233	266	300	233	233	245	220	260	210	0.913	0.087	CL1
454	UMPPL506	Fusarium graminearum	2019	Manitoba (MB)	Southwest Manitoba (MB1)	3	Odanah	Spring wheat	3ADON	233	230	240	260	255	233	240	230	255	200	0.29	0.71	CL2
455	UMPPL507	Fusarium graminearum	2019	Manitoba (MB)	Southwest Manitoba (MB1)	3	Odanah	Spring wheat	3ADON	233	210	240	266	233	230	240	220	255	200	0.473	0.527	CL2
456	UMPPL508	Fusarium graminearum	2019	Manitoba (MB)	Southwest Manitoba (MB1)	3	Odanah	Spring wheat	3ADON	233	230	240	260	233	230	240	220	255	200	0.279	0.721	CL2
457	UMPPL509	Fusarium graminearum	2019	Manitoba (MB)	Southwest Manitoba (MB1)	3	Odanah	Spring wheat	3ADON	233	230	266	300	230	240	240	220	255	210	0.275	0.725	CL2
458	UMPPL510	Fusarium graminearum	2019	Manitoba (MB)	Southwest Manitoba (MB1)	3	Odanah	Spring wheat	15ADON	233	220	266	266	230	255	210	230	258	220	0.608	0.392	CL1
459	UMPPL511	Fusarium graminearum	2019	Manitoba (MB)	Southwest Manitoba (MB1)	3	Yellowhead	Spring wheat	3ADON	210	200	248	200	230	240	220	190	240	158	0.515	0.485	CL1
460	UMPPL512	Fusarium graminearum	2019	Manitoba (MB)	Southwest Manitoba (MB1)	3	Yellowhead	Spring wheat	3ADON	245	200	266	240	230	230	245	210	260	210	0.942	0.058	CL1
461	UMPPL513	Fusarium graminearum	2019	Manitoba (MB)	Southwest Manitoba (MB1)	3	Yellowhead	Spring wheat	3ADON	240	233	266	200	266	230	240	210	233	220	0.96	0.04	CL1
462	UMPPL514	Fusarium graminearum	2019	Manitoba (MB)	Southwest Manitoba (MB1)	3	Yellowhead	Spring wheat	3ADON	240	233	266	200	266	230	255	220	240	230	0.95	0.05	CL1
463	UMPPL515	Fusarium graminearum	2019	Manitoba (MB)	Southwest Manitoba (MB1)	3	Yellowhead	Spring wheat	3ADON	220	230	266	240	220	260	248	220	260	210	0.956	0.044	CL1
464	UMPPL516	Fusarium graminearum	2019	Manitoba (MB)	Southwest Manitoba (MB1)	3	Yellowhead	Spring wheat	3ADON	220	233	248	240	230	260	248	220	260	210	0.739	0.261	CL1
465	UMPPL517	Fusarium graminearum	2019	Manitoba (MB)	Southwest Manitoba (MB1)	3	Yellowhead	Spring wheat	3ADON	210	230	266	200	248	245	248	210	233	220	0.678	0.322	CL1
466	UMPPL518	Fusarium graminearum	2019	Manitoba (MB)	Southwest Manitoba (MB1)	3	Yellowhead	Spring wheat	3ADON	210	230	266	200	248	240	240	210	233	220	0.681	0.319	CL1
467	UMPPL519	Fusarium graminearum	2019	Manitoba (MB)	Southwest Manitoba (MB1)	3	Yellowhead	Spring wheat	3ADON	240	233	260	233	230	220	233	210	245	200	0.089	0.911	CL2
468	UMPPL520	Fusarium graminearum	2019	Manitoba (MB)	Southwest Manitoba (MB1)	3	Prairie View	Spring wheat	3ADON	240	233	270	290	230	233	255	220	240	210	0.037	0.963	CL2
469	UMPPL521	Fusarium graminearum	2019	Manitoba (MB)	Southwest Manitoba (MB1)	3	Prairie View	Spring wheat	3ADON	255	240	266	270	230	220	280	240	266	233	0.037	0.963	CL2
470	UMPPL522	Fusarium graminearum	2019	Manitoba (MB)	Southwest Manitoba (MB1)	3	Prairie View	Spring wheat	3ADON	255	233	266	270	230	266	290	240	266	233	0.035	0.965	CL2
471	UMPPL523	Fusarium graminearum	2019	Manitoba (MB)	Southwest Manitoba (MB1)	3	Prairie View	Spring wheat	3ADON	255	240	266	290	230	233	260	230	240	210	0.026	0.974	CL2
472	UMPPL524	Fusarium graminearum	2019	Manitoba (MB)	Southwest Manitoba (MB1)	3	Prairie View	Spring wheat	3ADON	248	233	270	280	220	233	260	233	240	210	0.01	0.981	CL2
473	UMPPL525	Fusarium graminearum	2019	Manitoba (MB)	Southwest Manitoba (MB1)	3	Prairie View	Spring wheat	3ADON	248	233	270	290	220	233	260	233	240	210	0.142	0.858	CL2
474	UMPPL526	Fusarium graminearum	2019	Manitoba (MB)	Southwest Manitoba (MB1)	3	Prairie View	Spring wheat	3ADON	248	233	270	270	220	248	266	233	245	220	0.608	0.392	CL1
475	UMPPL527	Fusarium graminearum	2019	Manitoba (MB)	Southwest Manitoba (MB1)	3	Prairie View	Spring wheat	3ADON	255	233	270	270	233	248	266	233	255	220	0.036	0.964	CL2
476	UMPPL528	Fusarium graminearum	2019	Manitoba (MB)	Southwest Manitoba (MB1)	3	Prairie View	Spring wheat	3ADON	255	233	266	270	233	255	266	233	255	220	0.154	0.846	CL2
477	UMPPL529	Fusarium graminearum	2019	Manitoba (MB)	Southwest Manitoba (MB1)	3	Prairie View	Spring wheat	3ADON	255	233	266	270	220	266	270	233	255	220	0.096	0.904	CL2
478	UMPPL530	Fusarium graminearum	2019	Manitoba (MB)	Southwest Manitoba (MB1)	3	Prairie View	Spring wheat	3ADON	255	233	266	270	220	266	280	233	255	230	0.326	0.674	CL2
479	UMPPL531	Fusarium graminearum	2019	Manitoba (MB)	Southwest Manitoba (MB1)	3	North Cypress - Langford	Spring wheat	3ADON	240	233	266	230	210	266	290	233	280	233	0.466	0.534	CL2
480	UMPPL532	Fusarium graminearum	2019	Manitoba (MB)	Southwest Manitoba (MB1)	3	North Cypress - Langford	Spring wheat	3ADON	240	240	266	?	210	266	290	233	270	233	0.239	0.761	CL2
481	UMPPL533	Fusarium graminearum	2019	Manitoba (MB)	Central Manitoba (MB2)	7	Victoria	Spring wheat	3ADON	230	260	230	300	300	220	240	210	240	180	0.331	0.669	CL2
482	UMPPL534	Fusarium graminearum	2019	Manitoba (MB)	Central Manitoba (MB2)	7	Norfolk Treherne	Spring wheat	15ADON	230	270	220	180	266	220	230	220	266	170	0.048	0.952	CL2
483	UMPPL535	Fusarium graminearum	2019	Manitoba (MB)	Central Manitoba (MB2)	7	Norfolk Treherne	Spring wheat	3ADON	220	266	230	180	270	230	233	210	240	170	0.018	0.982	CL2
484	UMPPL536	Fusarium graminearum	2019	Manitoba (MB)	Central Manitoba (MB2)	7	Norfolk Treherne	Spring wheat	15ADON	230	270	220	180	266	230	230	220	266	170	0.018	0.982	CL2
485	UMPPL537	Fusarium graminearum	2019	Manitoba (MB)	Central Manitoba (MB2)	7	Norfolk Treherne	Spring wheat	15ADON	260	260	233	300	310	233	230	220	266	210	0.365	0.635	CL2
486	UMPPL538	Fusarium graminearum	2019	Manitoba (MB)	Central Manitoba (MB2)	7	Norfolk Treherne	Spring wheat	15ADON	230	266	233	190	290	233	210	220	266	200	0.046	0.954	CL2
487	UMPPL539	Fusarium graminearum	2019	Manitoba (MB)	Central Manitoba (MB2)	8	Roland	Spring wheat	3ADON	230	233	240	310	248	233	240	200	255	190	0.981	0.019	CL1
488	UMPPL540	Fusarium graminearum	2019	Manitoba (MB)	Central Manitoba (MB2)	8	Argyle	Spring wheat	3ADON	230	255	248	180	266	230	233	210	233	170	0.961	0.039	CL1
489	UMPPL541	Fusarium graminearum	2019	Manitoba (MB)	Central Manitoba (MB2)	8	Roland	Spring wheat	3ADON	210	240	240	300	255	233	240	200	260	190	0.973	0.027	CL1
490	UMPPL542	Fusarium graminearum	2019	Manitoba (MB)	Central Manitoba (MB2)	8	Roland	Spring wheat	3ADON	233	240	255	310	270	233	240	233	266	190	0.906	0.094	CL1
491	UMPPL543	Fusarium graminearum	2019	Manitoba (MB)	Central Manitoba (MB2)	8	Roland	Spring wheat	15ADON	240	255	248	258	266	230	230	233	266	230	0.911	0.089	CL1
492	UMPPL544	Fusarium graminearum	2019	Manitoba (MB)	Central Manitoba (MB2)	8	Pembina	Spring wheat	3ADON	233	260	220	200	300	233	233	220	270	170	0.036	0.964	CL2
493	UMPPL545	Fusarium graminearum	2019	Manitoba (MB)	Central Manitoba (MB2)	8	Pembina	Spring wheat	3ADON	220	266	220	170	270	233	240	220	270	170	0.027	0.973	CL2
494	UMPPL546	Fusarium graminearum	2019	Manitoba (MB)	Central Manitoba (MB2)	8	Pembina	Spring wheat	3ADON	220	266	233	230	270	233	233	220	270	170	0.039	0.961	CL2
495	UMPPL547	Fusarium graminearum	2019	Manitoba (MB)	Central Manitoba (MB2)	8	Pembina	Spring wheat	15ADON	233	270	230	310	270	210	230	230	266	160	0.111	0.889	CL2
496	UMPPL548	Fusarium graminearum	2019	Manitoba (MB)	Central Manitoba (MB2)	8	Pembina	Spring wheat	15ADON	266	245	248	180	240	210	210	233	266	230	0.927	0.073	CL1
497	UMPPL549	Fusarium graminearum	2019	Manitoba (MB)	Central Manitoba (MB2)	8	Louise	Spring wheat	3ADON	248	233	255	310	240	220	233	230	266	160	0.385	0.615	CL2
498	UMPPL550	Fusarium graminearum	2019	Manitoba (MB)	Central Manitoba (MB2)	8	Louise	Spring wheat	3ADON	248	233	260	310	245	220	233	210	266	160	0.029	0.971	CL2
499	UMPPL551	Fusarium graminearum	2019	Manitoba (MB)	Central Manitoba (MB2)	8	Louise	Spring wheat	15ADON	260	260	260	220	266	210	230	233	266	230	0.024	0.976	CL2
500	UMPPL552	Fusarium graminearum	2019	Manitoba (MB)	Central Manitoba (MB2)	8	Louise	Spring wheat	15ADON	260	258	255	180	255	230	220	233	266	230	0.022	0.978	CL2
501	UMPPL553	Fusarium graminearum	2019	Manitoba (MB)	Central Manitoba (MB2)	8	Louise	Spring wheat	3ADON	255	260	266	320	258	230	220	233	270	170	0.015	0.985	CL2
502	UMPPL554	Fusarium graminearum	2019	Manitoba (MB)	Central Manitoba (MB2)	8	Louise	Spring wheat	3ADON	240	260	266	270	260	230	220	240	255	220	0.015	0.985	CL2
503	UMPPL555	Fusarium graminearum	2019	Manitoba (MB)	Central Manitoba (MB2)	8	Louise	Spring wheat	3ADON	240	266	248	233	280	220	220	240	270	220	0.019	0.981	CL2
504	UMPPL556	Fusarium graminearum	2019	Manitoba (MB)	Central Manitoba (MB2)	8	Louise	Spring wheat	3ADON	240	266	270	270	290	230	230	240	270	180	0.017	0.983	CL2
505	UMPPL557	Fusarium graminearum	2019	Manitoba (MB)	Central Manitoba (MB2)	8	Louise	Spring wheat	15ADON	270	266	266	333	280	220	190	233	270	245	0.017	0.983	CL2
506	UMPPL558	Fusarium graminearum	2019	Manitoba (MB)	Central Manitoba (MB2)	8	Louise	Spring wheat	3ADON	240	266	270	240	290	230	220	240	270	220	0.339	0.661	CL2
507	UMPPL559	Fusarium graminearum	2019	Manitoba (MB)	Central Manitoba (MB2)	8	Louise	Spring wheat	3ADON	233	266	266	320	310	230	210	233	270	220	0.032	0.968	CL2
508	UMPPL560	Fusarium graminearum	2019	Manitoba (MB)	Central Manitoba (MB2)	8	Louise	Spring wheat	3ADON	233	266	270	266	300	230	245	240	270	180	0.016	0.984	CL2
509	UMPPL561	Fusarium graminearum	2019	Manitoba (MB)	Central Manitoba (MB2)	8	Rhineland	Spring wheat	3ADON	233	240	233	266	266	233	233	230	266	190	0.05	0.95	CL2
510	UMPPL562	Fusarium graminearum	2019	Manitoba (MB)	Central Manitoba (MB2)	8	Rhineland	Spring wheat	3ADON	230	240	248	233	266	233	240	233	240	190	0.032	0.968	CL2
511	UMPPL563	Fusarium graminearum	2019	Ontario (ON)	_	_	Elora	Spring wheat	15ADON	220	260	266	190	290	233	266	230	280	245	0.011	0.989	CL2
512	UMPPL564	Fusarium graminearum	2019	Ontario (ON)	_	_	Elora	Spring wheat	15ADON	220	266	270	190	300	233	266	230	290	255	0.01	0.99	CL2
513	UMPPL565	Fusarium graminearum	2019	Ontario (ON)	_	_	Elora	Spring wheat	15ADON	230	266	270	200	300	233	266	230	290	260	0.013	0.987	CL2
514	UMPPL566	Fusarium graminearum	2019	Ontario (ON)	_	_	Elora	Spring wheat	15ADON	233	260	270	200	300	233	266	230	290	266	0.014	0.986	CL2
515	UMPPL567	Fusarium graminearum	2019	Ontario (ON)	_	_	Elora	Spring wheat	15ADON	233	260	270	190	300	233	266	230	290	266	0.012	0.988	CL2
516	UMPPL568	Fusarium graminearum	2019	Ontario (ON)	_	_	Elora	Spring wheat	15ADON	233	260	270	190	300	233	266	230	290	266	0.012	0.988	CL2
517	UMPPL569	Fusarium graminearum	2019	Ontario (ON)	_	_	Elora	Spring wheat	15ADON	230	260	270	190	310	233	266	230	290	270	0.011	0.989	CL2
518	UMPPL570	Fusarium graminearum	2019	Ontario (ON)	_	_	Elora	Spring wheat	15ADON	233	260	270	270	248	230	233	230	290	270	0.014	0.986	CL2
519	UMPPL571	Fusarium graminearum	2019	Ontario (ON)	_	_	Elora	Spring wheat	15ADON	233	266	270	270	266	220	233	220	270	270	0.014	0.986	CL2
520	UMPPL572	Fusarium graminearum	2019	Ontario (ON)	_	_	Elora	Spring wheat	15ADON	233	266	270	270	266	230	233	230	290	270	0.011	0.989	CL2
521	UMPPL573	Fusarium graminearum	2019	Ontario (ON)	_	_	Elora	Spring wheat	15ADON	233	266	270	270	260	210	233	220	280	270	0.012	0.988	CL2
522	UMPPL574	Fusarium graminearum	2019	Ontario (ON)	_	_	Elora	Spring wheat	15ADON	240	270	266	180	290	220	245	210	280	270	0.01	0.99	CL2
523	UMPPL575	Fusarium graminearum	2019	Ontario (ON)	_	_	Elora	Spring wheat	15ADON	240	270	270	270	266	210	233	220	280	266	0.015	0.985	CL2
524	UMPPL576	Fusarium graminearum	2019	Ontario (ON)	_	_	Elora	Spring wheat	15ADON	240	270	266	180	300	210	245	210	270	270	0.01	0.99	CL2
525	UMPPL577	Fusarium graminearum	2019	Ontario (ON)	_	_	Elora	Spring wheat	15ADON	240	270	266	180	290	210	245	200	270	266	0.011	0.989	CL2
526	UMPPL578	Fusarium graminearum	2019	Ontario (ON)	_	_	Elora	Spring wheat	15ADON	260	240	260	266	240	230	220	230	240	240	0.036	0.964	CL2
527	UMPPL579	Fusarium graminearum	2019	Ontario (ON)	_	_	Elora	Spring wheat	15ADON	266	255	260	260	240	230	233	233	240	248	0.022	0.978	CL2
528	UMPPL580	Fusarium graminearum	2019	Ontario (ON)	_	_	Elora	Spring wheat	15ADON	233	240	240	190	255	230	240	233	240	255	0.084	0.916	CL2
529	UMPPL581	Fusarium graminearum	2019	Ontario (ON)	_	_	Elora	Spring wheat	15ADON	266	260	266	266	240	230	233	233	240	240	0.019	0.981	CL2
530	UMPPL582	Fusarium graminearum	2019	Ontario (ON)	_	_	Elora	Winter wheat	15ADON	233	266	266	180	233	220	240	233	240	260	0.022	0.978	CL2
531	UMPPL583	Fusarium graminearum	2019	Ontario (ON)	_	_	Elora	Winter wheat	15ADON	233	266	266	180	233	230	240	230	240	260	0.026	0.974	CL2
532	UMPPL584	Fusarium graminearum	2019	Ontario (ON)	_	_	Elora	Winter wheat	15ADON	233	266	260	180	230	230	233	230	240	260	0.013	0.987	CL2
533	UMPPL585	Fusarium graminearum	2019	Ontario (ON)	_	_	Elora	Winter wheat	15ADON	240	266	260	180	230	230	240	220	233	255	0.025	0.975	CL2
534	UMPPL586	Fusarium graminearum	2019	Ontario (ON)	_	_	Elora	Winter wheat	15ADON	240	260	248	180	240	230	240	220	230	260	0.025	0.975	CL2
535	UMPPL587	Fusarium graminearum	2019	Ontario (ON)	_	_	Elora	Winter wheat	15ADON	240	266	260	180	240	233	233	220	230	266	0.014	0.986	CL2
536	UMPPL588	Fusarium graminearum	2019	Ontario (ON)	_	_	Elora	Winter wheat	15ADON	240	270	260	180	260	230	233	210	230	266	0.009	0.991	CL2
537	UMPPL589	Fusarium graminearum	2019	Ontario (ON)	_	_	Elora	Winter wheat	15ADON	240	270	260	180	240	230	233	210	220	266	0.011	0.989	CL2
538	UMPPL590	Fusarium graminearum	2019	Ontario (ON)	_	_	Elora	Winter wheat	15ADON	233	255	260	180	230	210	233	210	220	266	0.011	0.989	CL2
539	UMPPL591	Fusarium graminearum	2019	Ontario (ON)	_	_	Elora	Winter wheat	15ADON	233	270	260	260	230	220	233	220	230	270	0.013	0.987	CL2
540	UMPPL592	Fusarium graminearum	2019	Pennsylvania (USA)	_	_	Rockspring	Spring wheat	15ADON	233	260	260	230	230	230	200	200	220	245	0.014	0.986	CL2
541	UMPPL593	Fusarium graminearum	2019	Pennsylvania (USA)	_	_	Rockspring	Spring wheat	15ADON	233	260	260	233	230	220	233	200	230	270	0.013	0.987	CL2
542	UMPPL594	Fusarium graminearum	2019	Pennsylvania (USA)	_	_	Rockspring	Spring wheat	15ADON	233	260	240	180	220	230	233	220	220	280	0.015	0.985	CL2
543	UMPPL595	Fusarium graminearum	2019	Pennsylvania (USA)	_	_	Rockspring	Spring wheat	15ADON	266	266	240	190	220	230	220	210	230	270	0.014	0.986	CL2
544	UMPPL596	Fusarium graminearum	2019	Pennsylvania (USA)	_	_	Rockspring	Spring wheat	15ADON	240	266	240	190	220	230	230	220	230	280	0.015	0.985	CL2
545	UMPPL597	Fusarium graminearum	2019	Pennsylvania (USA)	_	_	Rockspring	Spring wheat	15ADON	255	266	240	260	220	220	210	210	220	270	0.015	0.985	CL2
546	UMPPL598	Fusarium graminearum	2019	Pennsylvania (USA)	_	_	Rockspring	Spring wheat	15ADON	248	266	240	220	220	220	233	220	210	280	0.047	0.953	CL2
547	UMPPL599	Fusarium graminearum	2019	Pennsylvania (USA)	_	_	Rockspring	Spring wheat	15ADON	255	266	240	260	220	230	233	210	200	266	0.018	0.982	CL2
548	UMPPL600	Fusarium graminearum	2019	Pennsylvania (USA)	_	_	Rockspring	Spring wheat	15ADON	233	248	240	220	270	230	230	220	230	290	0.029	0.971	CL2
549	UMPPL601	Fusarium graminearum	2019	Pennsylvania (USA)	_	_	Rockspring	Spring wheat	15ADON	230	248	240	210	233	240	230	200	190	270	0.045	0.955	CL2
550	UMPPL602	Fusarium graminearum	2019	Pennsylvania (USA)	_	_	Rockspring	Spring wheat	15ADON	233	248	260	200	248	240	240	210	240	230	0.052	0.948	CL2
551	UMPPL603	Fusarium graminearum	2019	Pennsylvania (USA)	_	_	Rockspring	Spring wheat	15ADON	266	248	270	210	248	233	245	230	240	233	0.154	0.846	CL2
552	UMPPL604	Fusarium graminearum	2019	Pennsylvania (USA)	_	_	Rockspring	Spring wheat	15ADON	258	255	266	210	233	233	245	220	240	240	0.047	0.953	CL2
553	UMPPL605	Fusarium graminearum	2019	Pennsylvania (USA)	_	_	Rockspring	Spring wheat	15ADON	280	260	240	240	245	233	233	220	230	210	0.051	0.949	CL2
554	UMPPL606	Fusarium graminearum	2019	Pennsylvania (USA)	_	_	Rockspring	Spring wheat	15ADON	233	248	266	220	300	233	245	220	240	230	0.023	0.977	CL2
555	UMPPL607	Fusarium graminearum	2019	Pennsylvania (USA)	_	_	Rockspring	Spring wheat	15ADON	240	260	266	230	300	233	245	230	245	233	0.031	0.969	CL2
556	UMPPL608	Fusarium graminearum	2019	Pennsylvania (USA)	_	_	Rockspring	Oats	15ADON	260	266	260	200	300	233	233	230	240	240	0.016	0.984	CL2
557	UMPPL609	Fusarium graminearum	2019	Pennsylvania (USA)	_	_	Rockspring	Spring wheat	15ADON	310	266	248	220	233	220	255	220	233	270	0.082	0.918	CL2
558	UMPPL610	Fusarium graminearum	2019	Pennsylvania (USA)	_	_	Rockspring	Spring wheat	15ADON	230	266	266	180	266	230	240	233	230	270	0.012	0.988	CL2
559	UMPPL611	Fusarium graminearum	2019	Pennsylvania (USA)	_	_	Rockspring	Spring wheat	15ADON	230	266	266	180	266	230	240	233	230	270	0.012	0.988	CL2
560	UMPPL612	Fusarium graminearum	2019	Pennsylvania (USA)	_	_	Rockspring	Spring wheat	15ADON	240	270	260	180	233	230	240	240	220	290	0.017	0.983	CL2
561	UMPPL613	Fusarium graminearum	2019	Pennsylvania (USA)	_	_	Landisville	Spring wheat	15ADON	260	266	260	200	255	230	233	230	240	270	0.023	0.977	CL2
562	UMPPL614	Fusarium graminearum	2019	Pennsylvania (USA)	_	_	Landisville	Spring wheat	15ADON	230	266	260	200	255	230	233	233	255	233	0.024	0.976	CL2
563	UMPPL615	Fusarium graminearum	2019	Pennsylvania (USA)	_	_	Landisville	Spring wheat	15ADON	230	260	260	200	240	230	233	233	240	233	0.018	0.982	CL2
564	UMPPL616	Fusarium graminearum	2019	Pennsylvania (USA)	_	_	Landisville	Spring wheat	15ADON	260	270	260	170	233	230	240	233	240	266	0.023	0.977	CL2
565	UMPPL617	Fusarium graminearum	2019	Pennsylvania (USA)	_	_	Landisville	Spring wheat	15ADON	266	266	260	200	255	230	240	233	233	240	0.034	0.966	CL2
566	UMPPL618	Fusarium graminearum	2019	Pennsylvania (USA)	_	_	Landisville	Spring wheat	15ADON	233	266	266	190	300	230	233	233	240	270	0.01	0.99	CL2
567	UMPPL619	Fusarium graminearum	2019	Pennsylvania (USA)	_	_	Landisville	Barley	15ADON	266	270	260	230	255	230	255	233	240	270	0.033	0.967	CL2
568	UMPPL620	Fusarium graminearum	2019	Pennsylvania (USA)	_	_	Landisville	Barley	15ADON	233	266	266	190	270	230	233	233	240	270	0.014	0.986	CL2
569	UMPPL621	Fusarium graminearum	2019	Pennsylvania (USA)	_	_	Landisville	Barley	15ADON	233	233	266	190	270	230	233	233	233	270	0.046	0.954	CL2
570	UMPPL622	Fusarium graminearum	2019	Pennsylvania (USA)	_	_	Landisville	Barley	15ADON	260	266	230	220	210	220	255	220	233	270	0.175	0.825	CL2
	a isolate ID in culture collection at the Plant Pathology Laboratory, Department of Plant Science, University of Manitoba
	b Ten VNTR loci are indicated in red together with their allelic sizes
	c Population membership proportion (q) obtained from STRUCTURE (Prichard et al. 2000).
	d CL1 and CL2 represents populations, K = 2 identified by the Evanno method (Evanno et al. 2005).
	Clones are indicated in bold allelic sizes. Only one member of clone was used for analysis
	? Missing data
